# Supplementary material for: Trends in access of plant biodiversity data revealed by Google Analytics
Source: Biodivers Data J. 2014 Nov 11;(2):e1558. doi: 10.3897/BDJ.2.e1558 (PMC4238075; doi:10.3897/BDJ.2.e1558)
Supplement: Supplementary material 1 — Index Herbariorum – Georeferenced herbaria of the world list [file biodiversity_data_journal-2-e1558-s001.csv]

Acronym	Coordinates
LTU	32.527466, -92.638290
PRC	50.071247, 14.419740
LP	-34.930294, -57.954510
HSNU	31.229186, 121.404575
SIENA	43.313942, 11.331400
TUMH	35.501122, 134.235092
CHAPA	19.483330, -98.900002
BRCH	30.674514, -96.369659
KEP	3.223091, 101.636452
CHARL	32.789613, -79.935952
ALBU	35.054737, -106.616257
ALBC	42.250740, -84.753021
UNIN	-23.822498, 29.732847
NICH	31.626650, 131.357224
URT	41.866959, 12.468390
AIBU	40.703442, 31.543989
DOV	39.192844, -75.524948
HTO	-10.712542, -48.403721
EGR	47.401947, 19.443243
OMA	41.259590, -96.011482
IBGE	-15.880918, -48.072857
KRF	56.001251, 92.885590
NY	40.866829, -73.880768
HAJB	22.995172, -82.339325
SYKO	61.667297, 50.843380
SYKO	61.667297, 50.843380
FH	42.377174, -71.113998
FIPIA	-6.892982, 107.614479
HUFU	-18.906649, -48.268753
YAR	57.573414, 39.854523
LAPL	67.912056, 33.058907
NNSU	56.260429, 43.805244
KBHG	43.483810, 43.658428
MIL	43.040211, -87.921654
IBIW	58.056950, 38.249100
TVBG	56.894100, 35.870651
UPSU	54.317692, 48.404480
WOCB	42.306728, -83.065910
MCNS	-24.792185, -65.409836
PDD	-36.874092, 174.780853
KURS	53.964081, 54.409382
HRP	-45.862473, -67.488907
NICE	43.701931, 7.279513
YELLO	44.975151, -110.694710
MARE	41.00418, 29.020276
UWA	-31.976566, 115.815590
UTEP	31.770611, -106.504181
KRAS	56.015141, 92.855736
UCWI	18.004946, -76.742638
ZA	45.815071, 15.972220
AUA	32.600030, -85.482219
UCSC	36.993729, -122.056969
BAFC	-34.612465, -58.397270
BEGO	32.706940, 35.575062
DUKE	35.999828, -78.945042
SWA	51.61759, -3.938341
BRM	53.531891, 8.544846
THIB	29.791867, -90.800006
JRAU	-26.184372, 28.009552
LAH	31.489000, 74.369003
QWA	-28.508369, 28.821739
LIMK	52.667992, -8.622510
WMW	51.583915, -0.012875
SYD	-33.888168, 151.191040
HCAT	38.080002, 46.291901
HTU	13.588793, 44.023215
TEX	30.28626, -97.733774
FFS	-33.934441, 18.869169
VI	57.639568, 18.293907
TEH	35.723712, 51.447966
LBV	0.418004, 9.490379
KLGU	54.728542, 20.482161
UNSW	-33.890079, 151.217667
OTT	45.427723, -75.667572
PUP	33.884998, 71.875000
WSRP	52.172340, 22.288260
PRU	-25.733654, 28.188097
UPEI	46.256790, -63.142052
RUBL	26.868870, 75.813812
RED	34.040531, -117.156250
KIRI	41.485847, -71.522308
URV	37.533741, -77.433464
CEBU	10.353769, 123.911045
MONTU	46.876110, -113.935272
SHD	54.073689, -0.950320
CALP	14.183470, 121.246490
NLUH	16.435829, 120.548607
PNBG	14.183470, 121.246490
PUH	14.658890, 121.073608
RYU	26.219620, 127.753868
URO	26.251970, 127.760399
PHIL	39.962341, -75.209053
SUVA	-18.141609, 178.441483
UOS	35.203175, -85.919848
VIST	18.342326,-64.972928
UWC	-33.900002, 18.633329
TOFO	35.614880, 139.581299
TROM	69.680273, 18.977273
TROM	69.680273, 18.977273
KEVO	69.9, 21.066570
UV	-33.033329, -71.650002
NHR	-2.245703, 29.619240
ABS	52.415736, -4.066709
UCNW	53.225388, -4.140306
UWFP	30.547264,-87.218313
UWPG	49.890087, -97.153397
FDLW	43.783661, -88.411949
UWGB	44.531896, -87.922616
RIVE	44.852229,-92.621634
UWSP	44.52735, -89.57094
UWEC	44.832207, -91.523560
UWL	43.817883, -91.236229
UWM
WOLL	-34.407650, 150.874924
WYAC	41.315407, -105.569158
ZAHO	45.815071, 15.972220
UZL	-15.395515, 28.333762
CAH	-17.763710, 31.047649
MGS	50.348782, 18.925381
CEPEC	-14.798973, -39.281906
ARSEF	42.446243, -76.469963
UHI	33.239639, 35.653950
CRP	-41.160702, -71.312401
VAS	41.685326, -73.897873
FULD	50.563023, 9.676594
HNU	20.99588, 105.807416
HNU	20.99588, 105.807416
WI	54.689159, 25.279800
VDAC	37.546387, -77.435074
VMIL	37.782566, -79.444138
VSUH	37.227718, -77.402222
ROAN	37.296329, -80.001129
HLO	48.426064, 17.796843
OLM	49.608486, 17.266468
CWU	49.996639, 36.257259
VOR	51.646698, 39.995159
BRVU	50.817970, 4.395981
WAG	51.967367, 5.675883
WFU	36.169151, -80.289978
WAUF	52.161896, 21.048512
WARMS	52.281681, -1.590630
WASH	39.036930, -95.700447
DWC	39.967796, -75.576569
WCSU	41.400153, ,-73.444057
MSUN	51.962399, 7.612071
WTS	34.981728, -101.909462
WVIT	38.179490, -81.325865
WII	30.282789, 77.978897
WTR	51.0584, -1.314443
ACH	-34.905212, 138.593689
WRSL	51.117058, 17.046000
XJA	43.799999, 87.583328
XJA	43.799999, 87.583328
XJBI	43.833080, 87.575455
XJU	43.777580, 87.578735
XJUG	43.777580, 87.578735
HITBC	21.453550, 101.307831
NCBS	41.306648, -72.913376
YAM	34.185829, 131.471390
RANG	16.832914, 96.121666
YCH	34.545623, -112.456969
ERCB	40.181129, 44.513641
ERHM	40.181129, 44.513641
YUO	41.126202, -80.646599
CHER	48.537521, 28.107285
PL	49.744469, 13.380260
ZMT	49.216236, 15.872927
SARA	43.852535, 18.384930
ZJMA	30.2553, 102.1689
ZM	30.2553, 102.1689
HAS	-30.057430, -51.184361
HJBS	39.758598, 2.708205
FUGR	34.716061, -82.384338
GAUF	36.0564, 103.7922
GSFS	37.1467, 106.7806
TBI	41.68933, 44.790281
GGB	40.162762, -105.202011
GLR	51.859791, -2.244170
WMGC	42.582008, -70.821701
GPA	55.283333, -118.769817
SSMF	46.504429, -84.303459
GSMNP	35.700096, -83.521652
WCH	51.486526, 0.096572
GXDC	22.804819, 108.327214
GXMI	22.8167, 108.3167
GXCM	22.880619, 108.288391
GAUA	22.844303, 108.269567
GLMC	25.280592, 110.296569
HGAS	26.647481, 106.630103
GNUG	26.586220, 106.723488
FDG	6.804480, -58.155270
GNUC	35.150261, 128.110733
HUEF	39.919868, 32.854271
HAKS	6.916670, 80.816673
HCMS	51.064024, -1.319269
HHBG	30.238880, 120.124290
HNHM	37.205799, 126.784203
HNIP	21.019808, 105.859076
HZTC	38.1161, 112.3192
HBFH	30.547585,-87.22091
FABR	44.189651, 4.845680
GHPG	-34.363029, 18.902033
HWB	51.566761, -0.340680
SZB	47.800541, 13.038936
AMO	19.423613, -99.220505
COV	52.4065, -1.504553
HFD	52.05473, -2.717679
HER	-34.411747, 19.288393
HPU	35.971142, -79.997116
GUH	30.242950, 78.895081
DH	42.872921, -76.975533
SAPA	43.072071, 141.342133
SAP	43.072071, 141.342133
RTE	51.235027, -0.203958
HKBU	22.4141, 114.169325
HMP	48.761726, 18.641132
HL	44.326420, -84.773201
HPC	31.659929, -98.943710
HNNU	28.197269, 113.020447
BP	47.476372, 19.099058
SOB	49.257431, 14.720830
WPBS	52.433464, -4.017265
ISM	39.744862, -89.632721
ISU	40.519943, -89.010638
HCIO	28.619770, 77.158936
IARI	28.619770, 77.158936
IUP	40.616631, -79.160652
IUI	37.456211, 126.659813
INIF	19.351759, -99.157043
RELC	28.649328, -106.071281
NMAC	40.810558, 111.652222
HIMC	40.810558, 111.652222
IAV	33.962738, -6.784885
LILLE	50.613535, 3.067911
HNBU	12.364230, -1.538340
HBIL	41.609165, 0.618340
QSA	47.367580, -70.039467
IFP	41.7922, 123.4328
MAG	59.569027, 150.778229
BILAS	54.747528, 25.292534
BILAS	54.747528, 25.292534
ERE	40.181129, 44.513641
SAV	48.168743, 17.074930
KOR	52.254017, 17.087639
LWKS	49.827660, 24.008671
UUH	51.819000, 107.628693
HBI	30.539921, 114.368629
ZTS	49.304630, 19.962749
GUAD	16.177818, -61.596298
INH	47.478619, -0.606020
IACM	-22.896778, -47.065731
FMB	4.467730, -74.124382
IBA	43.488762, -6.107020
IBI	-23.585842, -46.647133
ORT	28.231985, -15.524335
TNFS	57.057481, -135.349055
HAMAB	0.002490, -51.073410
MAC	-9.640474, -35.745403
IMSSM	19.346386, -99.162094
INEGI	21.862978, -102.286133
CIAN	22.146753, -102.273720
INA	41.368080, -8.479859
IPCN	-40.163528, -71.349319
JACA	42.541737, -0.596659
LISI	38.708591, -9.184205
CREG	20.420321, -103.388489
MEMO	25.660919, -100.297333
MAKAR	43.290272, 17.022961
LCF	-34.658337, -58.658337
ILCA	9.015703, 38.814572
ILH	43.377776, -95.18235
IPS	52.059863, 1.150394
ICP	33.884998, 71.875000
TOM	45.074039, 7.655760
BI	41.107483, 16.878159
ROPV	41.932945, 12.556478
ITAE	44.687973, 8.032249
CORO	11.409170, -69.667221
LW	49.827660, 24.008671
KRA	50.059799, 19.948090
PECS	46.024860, 18.244225
LPA	28.051676, -15.465950
JAUM	6.253615, -75.571869
TULV	4.097413, -76.198318
JBVN	43.685265, 7.209677
JJU	35.820080, 127.099052
JXAU	28.655760, 115.905052
JXM	28.659824, 115.918625
CB	48.972740, 14.476070
CB	48.972740, 14.476070
JU	23.126961, 113.332708
JBG	-26.159306, 28.011230
JONK	-33.870419, 18.849661
KAG	31.559441, 130.548767
KANA	36.549889, 136.722107
KWNU	36.577614, 127.541618
KSC	39.200454, -96.581819
KMKV	50.223953, 12.882006
GKAR	-33.640270, 19.480249
KBSMS	42.415230, -85.420425
KDL	54.331446, -2.742122
KHER	46.646063, 32.629518
KFUH	26.289195, 50.210784
KSU	24.709311, 46.783169
KSUP	24.709311, 46.783169
ADO	39.861778, 33.482391
KMNH	33.866779, 130.792725
KNOX	40.955051, -90.342644
KOCH	33.549792, 133.487447
PC	48.842178, 2.359820
NEFI	45.739349, 126.652008
W	48.204708, 16.362471
CHAB	48.372044, 135.041443
CPF	-29.603004, 30.379345
KHUS	35.905910, 128.634628
KNUH	37.08964, 127.084243
KNU	35.893459, 128.608276
FU	33.627503, 130.422936
LHT	60.768623, 21.553043
LKHD	48.411728, -89.289749
LCVA	53.358498, -110.859764
LSP	47.987793, -84.777008
LAMU	30.103333, -94.104797
LZU	36.055649, 103.856590
LOMA	33.925591, -117.453743
RIGB	56.973492, 24.190861
QFB	46.806557, -71.227539
SLU	46.467480, -80.982727
SLU	46.467480, -80.982727
SCA	4.024200, 9.214900
LOD	51.776421, 19.483210
LOD	51.776421, 19.483210
KEN	39.840870, -75.707535
LFCC	39.035899,-78.265896
LSUM	30.410921,-91.177184
GLOW	-25.467199, 30.978390
LDL	52.367071, -2.716375
CNHM	45.816437, 15.971672
MSB	48.164661, 11.499960
LBG	29.556780, 115.983109
PBM	13.764128, 100.525726
MHU	0.3351, 32.568286
MALA	49.201271, -124.011932
SDNH	-26.494385, 31.378405
MDNR	49.897968, -97.257729
MACO	51.416178, -1.735762
MWCF	38.299992, -77.474953
MASE	-29.316669, 27.483330
NASC	42.690357, -73.101616
NASC	42.690357, -73.101616
MRSH	-20.150000, 28.583330
KMG	-28.741083, 24.765522
GRK	55.950676, -4.767700
DEE	56.462513, -2.971359
MCN	30.179254, -93.210403
MAIC	35.514015, 24.018635
NFLD	47.594769, -52.690891
BRNL	49.209106, 16.614689
MID	43.998497, -73.132454
CYP	35.166672, 33.366669
BSIP	-9.433330, 159.949997
AA	43.250581, 76.951544
MANK	44.145646, -93.997006
MSCW	33.496151, -88.414871
BRNM	49.182621, 16.679131
MOAR	40.087702, -75.222316
MIM	53.687859, 91.664253
MRSC	-9.549996, 32.566666
LYD	-25.098335, 30.455067
SPAL	44.699272, 10.631559
MURU	-32.068703, 115.835815
ORM	47.94165, 1.929018
LUCH	42.789291, 0.592100
LUX	49.60985, 6.136014
LUG	46.000473, 8.974958
ROV	45.889900, 11.041050
HBBS	45.553108, 10.227940
GDOR	44.401455, 8.942552
TSM	45.644730, 13.759840
VER	45.441570, 10.992640
VIT	42.850113, -2.675045
VIT	42.850113, -2.675045
TFMC	28.469025, -16.254740
CAR	10.489393, -66.843674
TOGR	45.053860, 7.702280
MFU	46.059330, 13.232719
MRSN	45.064697, 7.688715
MVJB	-34.863792, -56.117401
OSN	52.246170, 8.068350
MSV	46.613392, 13.844450
AUT	46.947960, 4.301869
BAY	43.491940, -1.472390
BOUM	47.077854, 2.393271
GRM	45.187347, 5.732911
NTM	47.212009, -1.565590
LR	46.164669, -1.151580
TLON	43.125717, 5.928460
CO	47.869522, -3.919115
PAT	48.842178, 2.359820
LWS	49.827660, 24.008671
HYO	34.884659, 135.192062
GM	49.225422, 17.663010
TNP	49.162323, 20.277454
AV	43.946602, 4.803350
MADM	32.649521, -16.911938
WIES	50.075855, 8.245490
SCH	47.708412, 8.637528
UMT	-18.971432, 32.667466
PPIU	51.228173, 51.354046
FMM	49.685871, 18.346371
CESK	49.724258, 18.590136
KHMS	49.143421, 13.554530
VYM	49.275993, 16.998543
MJ	49.396530, 15.589230
BOLV	-16.437445, -65.348976
NAU	32.106571, 118.763908
NF	32.098259, 118.799049
N	32.081879, 118.756439
NMMA	41.280374, -70.105114
BNH	25.048803, -77.348038
KSAN	-28.755072, 24.741783
RIY	24.709311, 46.783169
THIM	27.466089, 89.641907
NRRL	40.708641, -89.613129
HN	21.033387, 105.849833
NCKU	23.024759, 120.168114
ASH	37.950156, 58.379765
BBSUK	51.485607, -3.177393
GAB	-24.638390, 25.907900
NMB	-29.167772, 26.248554
TNM	24.157320, 120.683258
NMW	51.485607, -3.177393
NMW	51.485607, -3.177393
PPI	22.653139, 120.585472
CAIRC	30.099606, 31.323078
SYSU	22.764170, 120.332222
TNU	25.047760, 121.531853
CAYM	19.326084, -81.306473
ROML	-29.439850, 27.704109
SINU	1.299430, 103.773087
CBM	35.674297, 140.055775
BUL	-20.150000, 28.583330
SEY	-4.666670, 55.466671
NKME	50.988827, 11.022542
KASSEL	51.313347, 9.497600
HKGL	47.110378, 9.066390
MAAS	50.844959, 5.687840
HNWU	40.838607, -96.647412
NBYC	34.285634,-81.622375
NBM	45.267361, -66.082344
NHNE	43.175953, -71.814491
WNLM	48.203220, 15.633040
USPIY	57.630592, 39.879105
NMN	52.237037, -0.891612
NCATG	36.077068, -79.769852
NCSC	35.767792, -78.681892
CFSHB	-30.315710, 153.040070
NOSU	35.913239, -94.973824
WXM	53.053982, -3.004420
CFB	53.4884, -113.541253
DEK	41.957836, -88.721115
NM	46.555103, -87.396362
BDK	51.989441, -0.18876
NWOSU	36.797615, -98.657608
NATC	31.748191, -93.099024
NMSU	40.351965, -94.882758
NWTC	36.129700, 103.668930
HNWP	36.6167, 101.7667
NWFC	34.271927, 108.081802
NUV	44.165958, -72.651833
NOT	52.947707, -1.209526
NSAC	45.371334, -63.286079
UFS	1.674440, 31.715000
OAKL	37.798309, -122.264572
IFE	7.277900, 4.476780
LI	47.189198, 14.693395
LOC	34.139626, -118.211708
OMJ	50.436489, 15.350620
CHOM	50.458496, 13.422110
HOMP	49.682480, 13.987570
NJM	49.593418, 18.010944
OVMB	49.978851, 17.461554
VM	49.478539, 17.966034
SUM	50.016567, 16.953005
OKA	54.673069, 40.883320
ODU	36.887464, -76.30309
OLDS	51.785641, -114.115540
OMUB	41.366962, 36.185627
OSM	49.835178, 18.292810
VOA	63.099239, 21.602730
PPFI	33.884998, 71.875000
PMNH	33.718057, 73.060469
OL	49.576191, 17.278959
FRP	50.122482, 8.658621
KHOR	37.486697, 71.549554
PAN	30.750488, 76.748528
PSP	39.365940, -78.911697
PM	42.521549, -70.892876
KTC	50.882900, 20.652550
PEN	54.665551, -2.753942
PTH	56.396851, -3.426838
POLL	49.459549, 8.150340
KO	48.735619, 21.238760
OBPF	40.875416, -73.528763
IPO	51.941681, 5.615020
PLH	50.371529, -4.143050
OMP	50.115608, 15.123030
SSUC	-33.425626,-70.566897
MPUC	-30.047934, -51.216713
PRV	60.396412, 25.664240
PTIS	44.820160, -87.379959
PRB	50.118141, 14.412846
PCM	13.054397, 80.276680
PSU	7.017222, 100.515030
SMI	54.773071, -127.157990
LJM	46.001171, 14.478550
PGFA	44.020351, 43.071930
QYTC	35.7356, 107.6353
QBG	18.915632, 98.940498
QK	44.224190, -76.485397
RAMK	13.756984, 100.619297
RDG	51.441102, -0.950103
MMI	49.520855, 15.057241
TARI	35.723712, 51.447966
KUM	6.687105, -1.622117
WWF	28.036619, -97.494110
PDA	7.262200, 80.584099
TRU	50.263634, -5.0541
ZULU	-28.854441, 31.845831
CBY	51.278058, 1.07648
RI	45.074741, 13.650079
SAAS	-33.901852, 18.657240
SHC	12.50271, 78.567873
SWN	52.024967, 0.240302
SBU	42.077591, -78.482872
SMCW	44.495849, -73.163605
SAWV	39.284748, -80.561966
SBY	51.064071, -1.799856
SHST	30.683794, -95.533821
THRI	36.421215, -118.914886
LAPC	34.185598, -118.582735
SNPH	-29.316669, 27.483330
ESK	39.939373, 32.665257
NPRI	37.578609, 126.998428
SNU	37.478409, 126.951607
LIM	50.773460, 15.066110
SXDC	29.336538, 110.632111
SHMI	31.2222, 121.4581
SHMU	31.2222, 121.4581
SHTU	31.2222, 121.4581
SFD	54.073689, -0.950320
SYAU	41.7922, 123.4328
SIMS	51.902180, -8.348200
SHYB	52.703274, -2.763837
EMA	27.666128, 113.903343
SOSN	50.266159, 19.136560
OP	49.934582, 17.903641
AND	49.945919, 17.862255
SLRO	41.059918, -80.051346
NI	48.303333, 18.091719
AUA	32.600030, -85.482219
STRI	8.962998, -79.543706
RB	-22.964296, -43.227829
SLL	45.767361, 4.845310
CHE	49.642868, -1.630843
NCC	38.331372, -122.693963
KNP	-24.983330, 31.600000
DUR	33.995010, -96.368004
SEMO	37.315708, -89.52744
SOC	42.044460, -122.715881
WOH	35.532505, -98.700569
SWFC	27.024498, 101.080559
UVST	29.233522, -99.683266
KM	50.622791, 15.605300
SKU	14.650264, 77.551834
SAPCL	34.781780, -79.448662
NSWF	-33.749636, 151.040183
SIM	40.644249, -74.07845
GRO	53.177689, 6.605386
BING	42.109642, -75.901299
SCL	45.559643, -94.154877
ASTC	31.580093, -94.600296
KRMS	48.050308, 14.125894
STFX	45.614170, -61.984901
STI	56.118290, -3.944055
CAM	52.208524, ,0.117797
CSB	45.580121, -94.39481
RHT	10.830622, 78.695953
RHT	10.830622, 78.695953
SKT	53.41035, -2.143112
ROZ	50.161568, 14.383519
SMBB	48.718079, 19.137360
BLAT	18.935102, 72.834053
XCH	8.675947, 77.721199
SUN	54.903935, -1.380005
SKK	37.295872, 126.978279
ST	33.6361, 116.9789
SWC	39.906319, -75.352608
SYKT	61.667297, 50.843380
CEB	-0.900850, 119.860352
HCT	24.711300, 121.136673
TAIM	22.956724, 120.612404
TMP	61.502602, 23.760851
TANE	30.791109, 30.998060
TFD	-4.798801, 38.28992
TAC	32.214689, -98.214504
SIMF	45.123299, 34.210625
TB	41.724998, 44.790829
TEA	30.2553, 102.1689
ZV	48.570724, 19.118059
BTU	52.517958,13.324972
TEU	35.637741, 139.423630
TBY	51.672339, -4.695057
ETST	33.236984, -95.905594
TAIC	27.507553, -97.862358
DGS	54.154446, -4.481773
HUVA	-3.681122, -40.343239
STO	53.023285, -2.17768
YALT	46.943138, 37.263371
VENDA	-22.880560, 30.477686
IBF	47.258801, 11.400311
BHAG	25.282450, 86.886452
TUSG	38.252300, 140.855988
TOHO	35.806964, 140.132803
TMI	35.454369, 134.234482
TOYA	36.681671, 137.212555
TUP	44.302139, -78.3199
TUCH	27.701691, 85.320602
TCDL	53.399040, -6.128930
TCD	53.343048, -6.280650
NHT	-3.366670, 36.683331
THS	35.997540, 140.220795
CLE	54.894723, -2.936482
TLS	51.133969, 0.263468
TUNG	24.184820, 120.631493
UFA	54.751984, 55.965527
KWHA	50.441196, 30.527124
BULU	40.233002, 28.839500
DANV	49.858459, 8.642810
ABDH	24.195400, 55.670532
HFV	-39.806451,-73.237288
VALD	-39.800, -73.2333
ANSM	25.461399, -101.025864
CHAP	19.496241, -98.891937
HUAA	21.917740, -102.314087
CHIP	16.758566, -93.118599
CMMEX	31.866446, -116.618912
UAGC	17.546711, -99.486816
HUMO	18.974140, -99.237602
CFNL	24.856396, -99.565048
UNL	25.601954, -100.256165
HUAP	19.004061, -98.200478
QMEX	20.589319, -100.409645
UAS	24.800684, -107.396584
UAT	23.752705, -99.145256
UAMIZ	19.406652, -99.136993
Q	-0.121760, -78.465881
UCOB	10.022060, -69.464790
MAF	40.442799, -3.725880
AH	40.505501, -3.346680
EIF	-33.425863,-70.566663
SQF	-33.42582,-70.566725
HUC	8.739439, -75.880051
ITIC	13.709810, -89.197258
ZEA	19.768814, -104.366341
IBUG	20.695181, -103.431778
IBUG	20.695181, -103.431778
JAEN	37.768082, -3.797275
TFC	28.548546, -17.113695
TFC	28.548546, -17.113695
MVFQ	-34.863792, -56.117401
MVFQ	-34.863792, -56.117401
MVHC	-34.891220, -56.072208
MERC	8.598330, -71.144997
MER	8.598330, -71.144997
MERF	8.598330, -71.144997
TOLI	4.455119, -75.219948
HIP	-53.143044, -70.907158
MUB	38.012180, -1.155953
PAMP	42.817429, -1.643725
IRBR	10.466670, -64.166672
FCO	43.337879, -5.897943
VALPL	-33.044891, -71.621849
VALPL	-33.044891, -71.621849
SALA	40.964691, -5.677390
AGUAT	14.588848, -90.551921
USCG	14.621110, -90.526939
SEV	37.382111, -5.985560
USON	29.085829, -110.949837
AVE	40.629059, -8.634560
AVE	40.629059, -8.634560
UEVH	38.576908, -7.909513
HCB	-29.705231, -52.444824
HVR	41.321190, -7.741847
HRJ	-22.909210, -43.225029
CRI	-28.702593, -49.428246
EAN	-6.945920, -35.747856
UFG	-16.629566, -49.303020
ESAL	-21.245705, -45.006248
COR	-19.005625, -57.633854
UFMT	-15.610911, -56.064106
URM	-8.049211, -34.942211
HBR	-26.908520, -48.660950
UFMA	-2.556903, -44.311836
TEPB	-5.051380, -42.788132
TEPB	-5.051380, -42.788132
OBI	35.299393, -120.660057
UNIP	-23.555920, -46.682110
UJAT	18.022961, -92.961670
EBUM	19.690401, -101.197029
FCME	19.322994, -99.181137
MEXU	19.322994, -99.181137
MEXU	19.322994, -99.181137
HULE	12.435560, -86.879440
CPUN	-7.206799, -78.431633
VALLE	3.519569, -76.294418
AMAZ	-3.739145, -73.253250
LPS	-34.930294, -57.954510
JVR	9.999054, -84.115196
CUZ	-13.521628, -71.959389
IPMY	10.295860, -67.558731
USP	40.398666, -3.857355
CORU	18.890175, -96.929077
CIB	19.528755, -96.906487
FER	44.842102, 11.623554
FIAF	43.782078, 11.220205
AQUI	42.367569, 13.348240
AQUI	42.367569, 13.348240
LEC	40.332130, 18.120520
MIPV	45.476891, 9.226420
MI	45.476875, 9.224281
MOD	44.648022, 10.933820
PAD	45.399551, 11.879650
TSB	45.659908, 13.794450
TSB	45.659908, 13.794450
CLU	39.309990, 16.250191
ANC	43.575771, 13.512820
CAME	43.298161, 13.441080
CAME	43.298161, 13.441080
FIPF	43.782078, 11.220205
GE	44.417320, 8.926590
PAV	45.185501, 9.162740
SASSA	40.723141, 8.557500
SS	40.724049, 8.555940
UVV	45.437290, 12.349290
BCB	41.501255, 2.090671
HGI	41.966141, 2.831300
HGI	41.966141, 2.831300
VAL	39.475449, -0.385900
VAL	39.475449, -0.385900
VAL	39.475449, -0.385900
VAL	39.475449, -0.385900
IASI	47.197769, 27.548460
CLA	46.765060, 23.589296
KAS	51.280769, 9.449335
IB	47.263299, 11.383751
IB	47.263299, 11.383751
BACP	-34.595036, -58.440365
LZ	51.33096,12.394093
ULM	48.423161, 9.958280
ANGUC	47.464668, -0.548650
DAKAR	14.693700, -17.444059
LY	45.777885, 4.863628
UCJ	5.341110, -4.028060
DI	47.31254, 5.072626
CN	49.188965, -0.363437
LIP	50.613535, 3.067911
LIP	50.613535, 3.067911
OUA	12.364230, -1.538340
UPF	-17.557631, -149.605988
UQAR	48.453751, -68.514030
BENIN	6.35, 2.43
BORH	6.018091, 116.128738
ALEX	31.191669, 29.911940
AEF	39.936255, 32.830769
AEF	39.936255, 32.830769
DEVA	36.400177, -116.859268
BUA	33.316101, 44.198299
BUH	33.340580, 44.400879
BSRA	30.534880, 47.788849
BERN	46.953011, 7.451042
UCBG	-24.638390, 25.907900
CR	9.927806, -84.069183
BURD	23.223652, 87.839058
BJA	-3.472340, 29.782967
UAC	50.916889, -113.987846
CALI	11.249243, 75.777306
CCG	5.100000, -1.250000
CCG	5.100000, -1.250000
CRAI	44.316589, 23.798582
DSM	-6.780055, 39.204653
DUH	28.670506, 77.201096
DUE	56.500000, -2.966670
EGHB	55.947455, -3.186631
UFH	-32.787472, 26.833168
GC	5.650000, -0.183330
OAC	43.544090, -80.240730
BRG	6.804480, -58.155270
HPP	59.591690, 22.692909
HKU	22.368681, 114.193667
HKU	22.368681, 114.193667
UCI	7.387780, 3.896390
UCI	7.387780, 3.896390
ISTE	41.012408,28.962243
ISTO	41.150002, 29.033331
JOE	60.620209, 26.560095
KY	38.016258, -84.482178
KHU	15.546650, 32.533611
LANC	54.010078, -2.786638
LATV	56.863342, 24.356428
RIG	56.959770, 21.013350
LTR	52.622497, -1.124543
LEA	49.697460, -112.848915
LJU	46.048477, 14.467880
LAF	30.211061, -92.020025
USLH	30.239912, -92.002106
UMFK	47.250301, -68.590004
KLU	3.117500, 101.649231
KLU	3.117500, 101.649231
HABAYC	31.051552, -97.496849
HDSM	41.628696, -71.002415
MASS	42.389279,-72.524271
UMBS	45.553329, -84.781677
MIN	44.984547, -93.181801
MIN	44.984547, -93.181801
MISS	34.364910, -89.530502
UMO	38.931068, -92.321838
NAI	-1.283330, 36.816669
NCE	54.920071, -1.813180
UNN	6.856100, 7.392700
UNN	6.856100, 7.392700
ISTC	42.511898, -92.460854
NTSC	33.210411, -97.144363
UNWH	-25.832199, 25.617146
ND	41.699901, -86.238813
NDG	41.699901, -86.238813
OTA	-45.874161, 170.503616
BOD	51.754028, -1.258110
ACAD	45.087132, -64.367485
UCAM	19.828947, -90.556966
GCNP	36.039509, -112.121567
OMC	37.779274, -122.182388
UTV	42.425610, 12.085700
CIMI	19.989079, -102.717361
ACA	37.983559, 23.704809
TRIN
ASU	33.41998, -111.93381
BER	45.705898, 9.659210
MALS	39.599510, -110.820183
PC	48.842178, 2.359820
NTS	36.085751, -115.147049
SD	32.731445, -117.148560
BCM	28.052210, -15.464726
ROHB	41.891571, 12.464870
CCSU	41.69358, -72.76422
KBRYO	37.424286, -84.702316
LFG	50.561378, 4.696808
IEC	-4.266900, 15.283270
CMV	50.079304, 4.637896
JNU	35.847599, 127.133904
CBU	36.625259, 127.454803
PMH	50.791455, -1.097058
ALB	44.698380, 8.036900
WAVI	44.570686, -69.638474
SOTO	36.619248, -93.235881
COLG	32.458897, -84.917412
LUCCA	43.841412, 10.509440
JA	37.357471, -5.979440
CNCTC	50.092659, 14.326420
DAL	44.635052, -63.595402
DMNH	39.788227, -84.202201
WINDM	49.973282, -98.294800
ADA	-34.929550, 138.599869
KLA	3.141200, 101.686531
SAR	1.506867, 110.326370
CAIH	30.062630, 31.249670
UAMH	53.570087, -113.437187
NDO	-12.816670, 28.200001
MDH	54.564453, -1.241713
DOR	52.923005, -1.480317
EAR	39.824441, -84.912708
HAVI	38.482948, -78.870613
TUB	48.537968, 9.032574
MPA	43.607634, 3.914164
EGE	38.459568, 27.209532
CIQR	18.544950, -88.264153
CEN	-15.746034, -47.912457
BAH	-13.002465, -38.506538
HJBL	15.715601, -87.461769
CHEP	-1.670475, -78.640854
ICEB	59.427422, 24.702770
EWH	36.799702, 128.647736
SJFM	44.419163, -72.018456
FRS	57.609301, -3.612002
ABDAM	57.147820, -2.100430
BAK	40.377670, 49.892010
CHIS	47.02661, 28.841611
SIAC	43.314293, 11.331104
POZ	52.409500, 16.918110
POZM	52.409500, 16.918110
ALAM	37.473869, -105.872902
MAY	45.280640, 39.330677
IZ	38.605240, 27.066450
AMH	18.520170, 73.830643
ROO	-25.734930, 28.186275
NLH	59.328395, 6.265147
NLH	59.328395, 6.265147
PEI	46.239223, -63.131958
SCS	50.284180, -107.785957
LRS	49.688061, -112.845581
WAC	-31.986551, 115.871399
CAIA	30.062630, 31.249670
CAIA	30.062630, 31.249670
IABH	31.974030, 35.926201
FB	48.002960, 7.884335
ACD	9.431808, 42.034031
APM	45.5000, -78.2333
ALMA	43.397419, -84.673248
ATCC	38.750883,-77.475546
BEI	33.888939, 35.494419
ANES	39.770958, 30.508286
MSE	56.710187, -2.4656
AAUF	31.883490, 117.178253
AIB	31.8639, 117.2808
ANUG	31.354429, 118.394058
ADT	-42.969311, 147.276108
HUBE	33.711300, -117.981506
BDPA	49.784653, 22.760880
MLY	48.301750, 18.335171
ARCH	27.181957, -81.355698
SMB	49.292572, 21.276148
TAUF	40.632721, 22.948717
TAU	37.977414, 23.715934
GLAM	55.868444, -4.291422
AJBC	22.216669, -80.469421
GAUBA	-35.303841, 149.126083
BHUPP	25.246620, 82.953362
DACB	24.000000, 90.333298
BAYLU	31.532681, -97.129189
BJM	39.880939, 116.397751
BNU	39.856628, 116.414421
MSKU	53.895077, 27.551128
BSU	50.590950, 36.580502
BELC	42.539532, -89.060585
ADMONT	47.576508, 14.460605
BEREA	37.569038, -84.292938
KDR	52.375668, -2.314695
QPLS	-0.110020, -78.296188
PORT	9.083330, -69.833328
NBSI	47.772640, 16.801632
BBG	33.486176, -86.774399
BIRA	52.479622, -1.903610
LEUN	52.148937, 9.946604
BULQ	45.356510, -71.836967
BTN	50.837108, -0.152915
BSN	42.348408, -71.100906
RFA	-22.794798, -43.194443
PBL	11.637650, 92.726105
BSJO	26.268410, 72.985817
BSIS	22.556789, 88.351913
BSHC	27.099421, 88.514313
BSI	18.528481, 73.885330
MAL	-15.383330, 35.333328
SRGH	-17.829350, 31.053890
DORT	51.479950, 7.460000
NCPF	51.460041, -2.601210
AAS	52.212708, 0.08011
WLK	52.129936, -122.137100
BIA	39.903271, 32.864761
BKL	40.666733, -73.961624
BRUN	4.940290, 114.948059
AYBY	51.782683, -0.734963
FPRL	51.700036, -0.372661
SOM	42.671280, 23.365330
CHUR	46.853619, 9.534510
WDNE	40.977364, -117.714668
SPRY	53.812714, -0.196681
BUT	39.808617, -86.182518
IMI	51.419229, -0.567405
SFV	34.236222,-118.526964
SHTC	37.521843, -120.855759
CGG	52.193219, 0.126386
CSR	44.602871, 40.089241
MSKH	53.895077, 27.551128
CCAU	30.499680, 114.372589
CIMAP	26.860718, 80.891975
CSFI	27.918270, 113.169090
GABAS	43.501171, -1.468510
ABRN	52.385503, -0.19082
BAIL	50.748032, 2.761330
KR	49.006718, 8.402801
KR	49.006718, 8.402801
KR	49.006718, 8.402801
CMV	50.079304, 4.637896
HCIB	24.148785, -110.306061
CHAF	34.137798, -117.575790
CHEL	51.484212, -0.163414
CHM	51.901799, 2.079632
CDBI	30.629990, 104.050308
CMMI	39.928440, 116.363579
CUHK	22.420153, 114.207086
MFUW	-12.894980, 31.922750
SM	29.556240, 106.628014
CHBG	-43.527905, 172.633545
BCU	13.745900, 100.536636
WAVI	44.570686, -69.638474
CSAT	17.993120, -93.385986
PRI	39.597824, -110.802048
COCO	38.834270, -104.822266
CS	40.583130, -105.023087
QUE	46.768150, -71.283234
CIECRO	52.212846, 0.11224
BLH	42.561901, -83.225616
FRI	-35.301552, 149.126617
CPNP	20.318792, 105.607967
DQTC	46.5833, 125
HNH	43.748821, -72.171761
DBG	39.729890, -104.960370
MAH	-24.638390, 25.907900
BK	13.798100, 100.551361
HFR	60.294361, 25.040242
FUH	38.624508, 39.181404
IBSD	23.158440, 112.567589
EKY	37.741955, -84.302559
ETSU	36.308163, -82.365067
ELN	57.649118, -3.310541
IPA	-8.066334, -34.918514
HEH	14.586720, -87.824715
FVCC	48.225903, -114.329041
STPE	27.762190, -82.633842
FSCL	28.029869, -81.943733
FKE	51.081666, 1.810731
VIA	10.238190, -67.570213
JAY	46.085812, 6.719802
CLP	14.183470, 121.246490
BUCF	44.430138, 26.101456
ANKO	39.925926, 32.824638
BIL	52.700119, 23.874340
DD	30.319902, 77.997154
RAF	20.850000, 95.891670
WAN	-1.260685, 116.829903
TFA	35.644779, 139.280426
TF	36.008308, 140.131758
JLFC	43.8508, 126.5603
EFH	6.417825, 7.441518
FHI	7.387780, 3.896390
FOR	60.815018, 23.625130
FHKSC	38.900009, -99.315742
GOFS	-29.115829, 26.150000
FNM	53.203869, 5.795690
GSU	53.48, 28.78
FNU	26.039150, 119.322609
IOC	-22.871660, -43.434822
FEZA	19.376221, -99.034927
WS	46.729516, -117.154102
IZTA	19.515730, -99.188568
KESC	42.927593, -72.277435
DAO	45.390972, -75.710833
VIC	-20.754238, -42.882229
YA	3.866670, 11.516670
OSUF	44.565216, -123.278687
HPPR	22.411533, -83.668304
HPVC	22.445715, -80.002274
IBSC	23.134489, 113.335953
IZAC	-29.410877, -66.834740
VNC	34.176798, -118.4175
RM	41.312439, -105.585541
ERA	-32.026051, -60.303680
MRC	46.971710, -113.965012
RMS	41.312439, -105.585541
MSM
TRT	43.667206, -79.394420
ECH	42.098621, -76.815208
BRM	53.531891, 8.544846
BO	-6.479770, 106.863441
UNAF	34.827290, -87.621712
YAF	25.0389, 102.7183
MOC	44.847343, -123.237358
OSC	44.566784, -123.281784
WTU	47.654602, -122.304474
VORG
SASK	52.132931, -106.629623
HSC	40.875530, -124.078362
SJNM	36.770004, -108.166245
SNM	32.775230, -108.283638
KNFY	41.715778, -122.638863
WCW	46.074879, -118.356407
DES	33.460413, -111.947937
SRP	43.6060,-116.2063
RICK	43.814949, -111.783821
CDA	38.481506, -121.468834
LSC	44.532619, -71.999924
LA	34.067020, -118.441391
RBE	-22.866541, -43.777222
PASM	33.150685,-117.183314
PORE	38.060669, -122.817123
SACT	38.565839, -121.425228
SBCC	34.40629, -119.697091
UADY	20.859745, -89.623062
M	48.164661, 11.499960
UVAL	14.606005, -90.487993
WVA	39.636791, -79.956033
EOSC	45.312355, -118.066002
ASC	35.158405, -111.669922
SPC	47.650146, -122.362435
NMCR	32.280681, -106.756005
PC	48.842178, 2.359820
PC	48.842178, 2.359820
JUA	-24.179981, -65.305344
BAL	-34.610950, -58.370625
BAA	-36.358597, -56.726871
WSCO	41.243294, -111.954536
CTES	-27.466669, -58.833328
KATO	40.992157, 39.760040
IRVC	33.634602, -117.829163
SF	-31.450001, -60.933331
FHL	48.546465, -123.012457
MEN	-33.013859, -68.870560
PAR	-32.026051, -60.303680
PBP	-43.253510, -65.304382
VMSL	-33.679520, -65.462250
STEU	-33.934441, 18.869169
USCH	33.994943, -81.028102
SDU	42.783760, -96.921829
STA	56.336795, -2.816424
UPNG	-9.405128, 147.169665
CAVA	36.359161, -121.551033
TAD	38.451626, 69.084869
ISL	33.750428, 73.135031
ULT	32.875191, 13.187460
FRU	42.848270, 74.512779
SZ	30.643080, 104.106781
CTESN	-27.466669, -58.833328
HR	50.214390, 15.829887
IB	47.263299, 11.383751
TAI	25.047760, 121.531853
GUADA	20.695799, -103.406090
CRMC	39.418480, -123.811508
RO	41.901184, 12.512421
LIV	53.409359, -2.978550
TAM	59.436310, 24.732742
ALCB	-13.006171, -38.507259
KVCH	62.211479, 34.263470
PZV	61.786530, 34.351700
FCAB	-22.978473, -43.233612
QUE	46.768150, -71.283234
UNEX	38.879459, -7.006500
MONT	45.660259, -111.043282
MO	38.6168, -90.2627
MO	38.6168, -90.2627
M	48.164661, 11.499960
M	48.164661, 11.499960
DAS	52.132862, -106.634178
JMUH	38.437029,-78.86754
FUEL	-23.310280, -51.162781
SZU	47.799957, 13.044200
TUT	35.818100, 126.992500
PMA	9.038990, -79.532600
VSM	48.726917, 21.253351
TK	56.489868, 84.880714
LAU	46.512352, 6.624652
GA	33.940811, -83.371429
MGC	36.719917, -4.420190
ULS	-29.909941, -71.246971
TUR	60.454651, 22.283367
WMNH	34.158772, 135.207092
DE	47.531647, 21.636345
ICN	-30.065620, -51.118011
SAKH	46.961262, 142.731979
UPCB	-25.462143, -49.287239
CUVC	3.424862, -76.493713
UCHT	35.044102, -85.071144
PMAE	53.570087, -113.437187
FRLH	13.093173, 77.581337
BSUH	40.203209, -85.407806
KMN	58.152569, 7.975500
GRA	-33.308739, 26.518990
KEM	55.344479, 86.084976
BELZ	50.581638, 35.975361
VGZ	52.839798, 50.449348
CHPU	55.071301, 61.403049
IRK	52.308102, 104.237823
VU	53.223450, 36.768856
UDU	56.849876, 53.218903
SASY	62.020000, 129.730423
VLA	43.150166, 131.910034
MOSP	55.815189, 37.648933
NS	54.827721, 83.102982
SYKO	61.667297, 50.843380
NSK	54.827721, 83.102982
SPI	45.023300, 41.963070
SBG	45.036587, 41.926529
OMSKM	55.022060, 73.311623
PKM	53.183670, 44.994553
SVER	56.808571, 60.607010
KAZ	55.789131, 49.126637
PERM	57.997799, 56.186180
POKM	58.021927, 56.119881
LENUD	42.974876, 47.413532
YOLA	56.620678, 47.897560
RWBG	47.228920, 39.658131
SMR	53.223579, 50.173859
HERZ	59.916740, 30.289980
LECB	59.939632, 30.299938
WIR	59.932350, 30.307882
KFTA	59.938156, 30.314781
VANF	38.557529, 43.272751
ACOR	-31.383057, -64.201416
ZT	47.37632, 8.547752
APP	42.335677, 13.589914
PRM	50.081062, 14.426747
CUZ	-13.521628, -71.959389
OXF	51.757610, -1.251880
FHO	51.757610, -1.251880
MEL	-37.833073, 144.983490
TUH	35.723712, 51.447966
MERL	-32.883331, -68.816673
CICY	21.019144, -89.634720
FIPIA	-6.892982, 107.614479
SCHG	-33.949379, 22.462481
MUR	36.614479, -88.317802
HXBH	-19.836336, -43.941685
BRISTM	51.457985, 2.602365
BSUH	40.203209, -85.407806
GUAM	13.446340, 144.800232
UFP	-8.047565, -34.939377
HAO	-8.110692, -79.012924
NCU	35.908252737698405, -79.05078828334808
CNF	45.819660, 15.938710
DBN	53.383137, -6.279062
SBSC	29.790880, -95.457100
SMS	37.229614, -93.300667
SOA	42.133949, 24.764709
HAM	43.250595, -79.851639
ESSE	39.770958, 30.508286
ABL	52.173889, 5.284966
WVW	38.990730, -80.220840
CIIDIR	24.050808, -104.608940
CMML	40.572839,-105.087978
KANU	38.95797, -95.249534
FUMH	36.316396, 59.534354
QCA	-0.229675, -78.524612
PACA	-29.752176, -51.114788
ANK	39.934793, 32.836662
BUAG	44.471260, 26.072500
DAOM	45.393967, -75.702560
WU	48.195267, 16.384521
MVFA	-34.891220, -56.072208
UCR	33.970255, -117.323882
EGR	47.401947, 19.443243
HUJ	31.773670, 35.219505
CANL	45.412472, -75.690906
WIN	49.810610, -97.133112
WFBVA	48.165665, 16.317940
LEB	42.593125, -5.576167
HZU	30.207550, 120.162109
BOZ	46.498625, 11.365979
AK	-36.874092, 174.780853
WANF	40.772336, -111.888894
BIGU	14.588848, -90.551921
PAP	-17.633329, -149.600006
KUN	25.0389, 102.7183
IBUG	20.695181, -103.431778
US	38.875900, -77.035324
USNC	38.888699, -77.025452
SP	-23.645382, -46.626062
CANB	-35.279613, 149.113785
ISTF	41.087258, 28.973356
LINC	-41.383053, 173.188599
OHN	57.275471, 16.446070
MICH	42.236097, -83.727204
FAUC	5.042338, -75.479919
EIU	39.479703,-88.175135
NX	-14.588181, -52.519249
HUCP	-25.450718, -49.252998
KRSU	56.005486, 92.838631
PAMP	42.817429, -1.643725
PI	43.719864, 10.396916
IRKU	52.268059, 104.388893
NSPM	44.644482, -63.585018
CLF	45.773655, 3.088735
GAZI	39.920357, 32.818905
UNDH	-29.854170, 31.049999
BEDF	42.338993, -71.426437
O	59.882641, 10.768130
FLD	37.287125, -107.874023
SOUT	40.881859, -72.360382
MTMG	45.404980, -73.936569
HAL	51.488132, 11.959793
BHUPM	52.529828,13.378702
BHUPM	52.529828,13.378702
MBK	33.544331, 133.586044
MVM	-34.863792, -56.117401
CHR	-43.640497, 172.476629
ADRZ	45.824074, 16.122107
IAC	-22.916218, -47.077919
TU	58.384167, 26.722181
TU	58.384167, 26.722181
BNL	50.675240, 7.176630
MCA	40.592743, -75.526711
NHES	41.330456, -72.919017
M	48.164661, 11.499960
SPR	42.104362, -72.587173
GESU	42.804863, -77.801018
XAL	19.528755, -96.906487
BOLO	44.499180, 11.352490
HUPG	-25.091095, -50.142277
GUYN	8.122220, -63.549721
LBL	51.243431, 22.540850
XAL	19.528755, -96.906487
NHA	43.152069, -70.930656
NHA	43.152069, -70.930656
LOU	42.432312, -8.646200
RHMD	28.618992, 77.158607
BRIT	32.755653, -97.328888
CONC	-36.826988, -73.049767
CHAM	-29.411160, -66.834686
HEM	16.767839, -93.114929
LISC	38.700001, -9.183940
OMA	41.259590, -96.011482
HCF	-23.900490, -51.522366
E	55.964436, -3.212712
WKU	36.987240, -86.455132
CHRB	40.479027, -74.437019
CHRB	40.479027, -74.437019
UPA	38.226891, 21.776405
UPA	38.226891, 21.776405
UPA	38.226891, 21.776405
HAST	25.047760, 121.531853
IEB	19.517342, -101.609863
UNB	45.947085, -66.640580
FLOR	-27.601561, -48.532417
ALTA	53.570087, -113.437187
GFJP	-20.735420, -42.051414
JBSD	18.484291, -69.920341
COLO	40.00688,-105.272624
RAB	34.008808, -6.841420
HEND	34.120880, -93.046143
SCP	-25.388809, -57.424908
STPS	51.480655, -0.246822
TEFH	14.091537, -87.198616
SOF	48.746899, 30.223467
BNRH	-25.099581, 30.456669
HPBR	-27.649675, -52.266747
BRNU	49.206070, 16.598869
MW	55.755791, 37.617630
MWG	55.752220, 37.615559
MT	45.558294, -73.558103
UNM	35.108345, -106.623810
KYO	34.995322, 135.783356
TO	45.054558, 7.684908
VPI	37.236561, -80.420029
BEL	54.581738, -5.952744
G	46.227467, 6.146478
G	46.227467, 6.146478
LYJB	45.773257, 4.833131
LIL	-26.840330, -65.222771
OSBU	52.260578, 8.049636
HUBO	44.512001, 11.401490
CL	46.762585, 23.596014
HMIM	41.676109, 2.801070
FCQ	-25.335076, -57.518336
MUCV	-37.918022, 145.127289
MUCV	-37.918022, 145.127289
CUW	42.244938, -71.805702
SZG	22.561522, 114.166367
CHUG	32.055345, 20.05312
NMNL	51.844742, 5.870086
IDS	42.860344, -112.431290
CMPH	19.465224, -98.89343
ROCH	40.670898, -73.927948
RHK	9.470668, 76.583527
UPR	18.440202,-66.055813
AMNH	65.683701, -18.099129
KTU	50.254028, 19.024385
JEF	38.345889, -85.820442
HUEFS	-12.237698, -38.958424
LWG	26.841572, 80.929840
BKF	13.823922, 100.568886
BAB	-34.658337, -58.658337
O	59.882641, 10.768130
HALA	34.735222, -86.607468
WELTU	-41.242111, 174.792374
BRLU	50.810081, 4.381855
BM	51.495634, -0.176441
IVGU	56.970581, 40.989746
BRLU	50.810081, 4.381855
BRLU	50.810081, 4.381855
HUNEB	-12.125460, -38.408260
KTU	50.254028, 19.024385
FFB	45.854160, -66.640526
RKT	29.803949, 79.988060
UWSP	44.52735, -89.57094
HHU	35.961639, 128.542786
JME	48.887901, 11.177996
HUQ	4.512680, -75.688721
HUNEB	-12.125460, -38.408260
COA	37.869350, -4.784380
HIPC	20.840416, -76.983475
MMMN	49.900200, -97.135536
PVB	53.477829, 49.357971
SPWH	41.523750, -70.661034
DUL	46.815605, -92.060852
BUNS	45.263630, 19.679611
SPF	-23.566484, -46.730999
BHSC	44.493618, -103.870255
MYF	10.459238, -66.820488
TROY	31.798080, -85.953873
UNA	33.209335, -87.539314
TO	45.054558, 7.684908
F	41.864983, -87.618469
CM	40.444012, -79.950363
POZG	52.443249, 16.927330
POZG	52.443249, 16.927330
CANU	-43.527905, 172.633545
GMDRC	35.012329, -115.653450
HUTPL	-3.991635, -79.204346
LTB	-37.693443, 145.062302
BAMU	19.902446, 75.313447
JHS	27.183990, 78.023369
HUTPL	-3.991635, -79.204346
SUK	16.691759, 74.258667
HCOM	43.230253, 5.458519
AU	24.436729, 118.107208
VIES	-20.267702, -40.298153
DUOF	40.896526, 31.174698
INGU	43.222439, 44.771721
EDTU	41.662533, 26.583990
VIES	-20.267702, -40.298153
NOCC	22.1852, 111.1119
RSU	54.639679, 39.672186
RSU	54.639679, 39.672186
LUKI	-4.3806, 15.3161
PHARM	-28.576500, 153.341843
BART	41.132572, -73.554321
DSC	33.747559, -90.733749
MPH	35.793900, 51.393501
MCF	41.999901, 21.451469
TGU	42.426414, 19.260376
LIV	53.409359, -2.978550
ACU	32.47117, -99.708712
SI	-31.372925, -64.222580
OSH	44.017761, -88.545097
CSAU	44.960129, 34.106075
TAAM	58.392519, 26.693691
BEOU	44.812576, 20.470509
TAA	58.355649,26.679469
KUO	62.883499, 27.675850
ENCB	19.458096, -99.189362
WARM	38.767086, -93.739723
AUB	41.942570, -86.337830
BREM	53.082333, 8.810480
OUPR	-20.388889, -43.704544
UTC	41.74322,-111.810758
NDA	46.853230, -96.798210
CAFB	53.4884, -113.541253
BSB	52.457052,13.302627
PEU	-33.946064, 25.525185
SAMU	47.233009, 16.621735
COI	39.722797, -9.170175
NA	38.916828, -76.959877
GUAY	-2.17863, -79.879787
SEL	27.328402, -82.539818
CIC	43.6527,-116.6776
JCT	-19.309507, 146.782959
LP	-34.930294, -57.954510
LP	-34.930294, -57.954510
NPWRC	46.913700, -98.714600
SPH	43.163345, -71.859856
SJ	18.391774, -66.059064
WHIT	33.957371, -118.022713
SICH	41.368832, -93.541016
DEWV	38.930988, -79.848869
CSU	35.655819, -97.474998
CSU	35.655819, -97.474998
OLV	42.436070, -84.925620
SNC	44.440903, -88.090904
CVCW	36.963783, -82.596031
RPM	40.327400, -75.949753
MOL	-12.080083, -76.948361
ZSS	47.356960, 8.535650
BIO	42.937472, -2.155697
BIO	42.937472, -2.155697
PTZ	61.786034, 34.309162
LOJA	-3.991635, -79.204346
TRTE	43.549508, -79.665153
TRTE	43.549508, -79.665153
ABH	38.345200, -0.481010
BSC	20.016228, -75.816852
ID	46.727840, -117.008270
POZW	52.443249, 16.927330
MAINE	44.896681, -68.671707
MEXU	19.322994, -99.181137
MEXU	19.322994, -99.181137
HMAS	39.9389, 116.3883
BAF	-34.597836, -58.397484
BAF	-34.597836, -58.397484
MS	38.262344, 15.597271
MCVE	45.438408, 12.322565
AJOU	37.273602, 127.057137
COL	4.825490, -74.034149
JE	50.929981, 11.590950
BIEL	51.964500, 8.579744
FSU	30.440241, -84.293747
BCMEX	31.866400, -116.669022
LPAG	-34.930294, -57.954510
UDW	-29.854170, 31.049999
BBS	5.866380, -55.166821
BBS	5.866380, -55.166821
AMD	52.156624, 4.483360
U	52.156624, 4.483360
MDKY	38.207916, -83.416168
PEUFR	-8.016192, -34.945225
NE	-30.488150, 151.641822
NMLU	47.051216, 8.301525
BAFC	-34.612465, -58.397270
TENN	36.020290, -83.924568
MAPR
BORD	44.844391, -0.558690
UNR	-33.018822, -60.863522
ATH	38.073479, 23.814480
BA	-34.604862, -58.437695
BA	-34.604862, -58.437695
ER	49.581589, 11.031680
LISFA	38.696754, -9.316860
FLOR	-27.601561, -48.532417
FLOR	-27.601561, -48.532417
TI	35.704708, 139.759445
RESC	40.526402, -122.290779
TAES	30.607281, -96.316521
UPCB	-25.462143, -49.287239
EA	-1.266758, 36.800989
CAHUP	14.165224, 121.245216
OLDM	53.540046, -2.109764
TUS	38.263358, 140.857031
TUS	38.263358, 140.857031
MHA	55.754005, 37.616592
MHA	55.754005, 37.616592
LSU	30.410988,-91.177232
GI	50.586578, 8.679664
NIPR	35.614880, 139.581299
SANT	42.856560, -8.535460
KL	46.627571, 14.292633
UME	63.898613, 19.896215
WH	30.539921, 114.368629
ECSC	34.772354, -96.662773
SOMF	42.671280, 23.365330
HRB	-12.976860, -38.480793
OAX	17.028946, -96.723404
RWPM	41.783865, -71.418571
CAT	37.514832, 15.082561
CDRI	26.854719, 80.957710
OSA	34.613380, 135.515594
PEM	39.989182, 116.339653
APP	42.335677, 13.589914
SRSC	30.363667, -103.650202
PO	41.154079, -8.642460
AZ	37.477047, -25.499216
TAIF	25.042139, 121.519867
DR	51.02873,13.723875
CUP	42.448183, -76.476471
UBT	49.923599, 11.556322
MUS	40.000278, -81.733177
HUT	-8.111261, -79.030267
VEN	10.489393, -66.843674
DLF	29.028408, -81.305428
APCR	35.295191,-93.134242
MWI	40.468652,-90.681984
KRAM	50.065483, 19.955404
MACF	33.87487, -117.91611
NEB	40.823132,-96.69779
BPI	39.022345, -76.923367
MH	11.013470, 76.935463
GJO	47.068539, 15.438710
TFAV	5.663890, -67.623611
HAS	-30.057430, -51.184361
HO	-42.905394,147.320665
FI	43.778660, 11.260010
NZFRI	-38.160409,176.264925
NO	29.934935,-90.122234
FR	50.116758,8.640538
UVIC	48.436306, -123.421539
CORT	42.599045,-76.188877
RNG	51.437623, -0.942091
F	41.864983, -87.618469
BRY	40.251541, -111.653053
LPB	-16.500000, -68.150002
F	41.864983, -87.618469
PYU	27.020868, 101.085701
ILLS	40.092927, -88.24027
VT	44.479755,-73.198565
BCN	41.381710, 2.115580
BCN	41.381710, 2.115580
MG	-1.451704, -48.477894
KPM	35.240910, 139.121536
C	55.685040, 12.571860
DAV	38.540901, -121.746399
PAC	40.798325, -77.866188
UPTC	5.550050, -73.354670
P	48.842178, 2.359820
RUNYON	25.900684, -97.492310
ALAJ	58.38328, -134.638953
BOTU	-22.881189, -48.479832
PSO	1.190978, -77.259285
MEXU	19.322994, -99.181137
MEXU	19.322994, -99.181137
WSP	46.727737, -117.165642
PREM	-25.735626, 28.217525
ALME	36.836056, -2.464630
BBB	-38.706360, -62.223194
BBB	-38.706360, -62.223194
CSLA	34.062328, -118.171555
UPOS	37.351151, -5.971430
HUB	39.860538, 32.741161
NEU	46.999512, 6.948589
LE	59.916740, 30.289980
LE	59.916740, 30.289980
NH	-29.857220, 31.012501
VBGI	43.130575,131.923777
HAC	23.109936, -82.392775
HAC	23.109936, -82.392775
HRCB	-22.385748, -47.541462
H	60.171391, 24.931173
NHIC	44.327068, -78.296432
LG	50.584209, 5.568112
BEO	44.027949, 20.91644
STR	48.584285, 7.766771
BB	-38.701623,-62.269507
HAW	21.301435, -157.814713
WELT	-41.290676, 174.781596
ILL	40.109043, -88.223877
NSDA	39.510521, -119.803162
GRSU	53.68, 26.53
GRSU	53.68, 26.53
PE	39.969683, 116.207739
ARIZ	32.231312, -110.949837
TNS	36.091122, 140.110184
PMSP	-23.551495, -46.640385
CAIM	30.062630, 31.249670
DAVFP	48.459192, -123.398228
SBBG	34.453556, -119.709351
LSUS	32.426811, -93.708282
VSC	30.863050, -83.287910
DAR	-33.328808, 149.085297
FLAS	29.643669, -82.341080
UQTR	46.342609, -72.539841
SOKO	50.179340, 12.640050
LUAI	-8.8383, 13.2344
LUBA	-14.916670, 13.500000
ARC	-38.816669, -68.066673
UBC	49.2758, -122.91315
JBL	9.825417, -83.847191
CGMS	-20.504297, -54.609512
BIOT	-6.577002, 106.910820
HMC	21.027464, -77.137718
DAO	45.390972, -75.710833
MA	40.412556, -3.692610
ABFM	40.001381, -75.249046
TKPM	34.047241, 134.528442
DAO	45.390972, -75.710833
FLSP	27.217648, -82.490410
GUA	-22.973310, -43.274670
BUF	42.906203, -78.843802
ANSP	39.953442, -75.171555
BRM	53.531891, 8.544846
HPSU	45.513104,-122.686145
ANSP	39.953442, -75.171555
SP	-23.645382, -46.626062
SBBG	34.453556, -119.709351
AHMA	18.520170, 73.830643
CGE	52.202862, 0.120710
RENZ	47.558250, 7.580980
USAS	50.449165, -104.622429
NYS	42.664928, -73.818825
ALF	43.60074, 3.898583
ALF	43.60074, 3.898583
GRSU	53.68, 26.53
FLAS	29.643669, -82.341080
AD	-34.920837, 138.618698
CWC	43.025238, -108.398918
BSCA	33.256481, -116.399406
SJSU	37.334789, -121.884827
GAT	51.818924, 11.284434
UPM	3.003613, 101.708931
PSUB	-19.983330, 23.416670
ARAN	43.292580, -1.959850
QAP	-0.229675, -78.524612
QAP	-0.229675, -78.524612
KASH	34.066359, 74.845691
GRJC	42.966251, -85.666443
USF	28.054560, -82.413071
ATHU	37.988125, 23.728739
ATHU	37.988125, 23.728739
MSC	42.722532, -84.473627
GB	57.619179, 11.658792
VBI	47.717102, 19.227789
VBI	47.717102, 19.227789
VBI	47.717102, 19.227789
TASM	41.303375, 69.265602
ESS	51.567417, 7.137300
MSUH	36.334999, 43.118889
MSUH	36.334999, 43.118889
CACS	41.926159, -87.633842
CACS	41.926159, -87.633842
LMU	-22.245384, 35.309818
NEMO	40.196125, -92.582550
UEC	-22.806753, -47.069469
OS	39.998150, -83.042313
KSTC	38.411465, -96.196053
MNHN	23.138330, -82.364166
SDC	44.309860, -96.773323
ANDA	-0.782456, 100.430786
MELIT	48.048676, 33.784798
ANHC	34.745555, -92.272947
PWU	49.589378, 34.513721
AUH	34.021317, 71.482101
SUFA	35.566444, 45.443498
CMS	9.354611, 76.311186
EWM	30.355534,-96.187765
ISE	-10.681795,-37.435991
MAUAM	40.544677,-3.699926
HNG	9.543531, -13.676337
MAUAM	40.544677,-3.699926
HNG	9.543531, -13.676337
UNITEC	-36.88063,174.7066
WAI	21.636315, -158.053064
CNPO	-31.318533, -54.110244
KFBG	22.432505, 114.119110
IEA	42.466462,1.492116
HALE	20.760307,-156.247108
MNVD	51.831238,12.242841
KIS	0.51163,25.208285
MISU	48.246542,-101.301539
DGU	35.862092, 128.587061
HUP	34.452000, 73.268997
MICG	14.583947,-90.553731
HSBU	35.798730, 51.395333
DNZ	48.015978,37.80329
DNZ	48.015978,37.80329
TAMU	30.614775, -96.338956
SGO	-33.425819, -70.566513
GAM	33.943068,-83.372895
WSCH	42.132174, -72.797078
DEN	40.064335, -82.508736
SLPM	22.126469, -100.943794
SUU	37.677116, -113.069351
BR	50.931194, 4.319976
HIB	30.531281, 114.411537
QCNE	-0.229675, -78.524612
IAGB	47.166660, 27.599991
SNUA	37.478409, 126.951607
UGDA	54.385170, 18.612812
BG	60.383560, 5.326110
TIE	39.092869, 117.189110
CONV	34.95623, -81.918359
PNH	14.601030, 120.976158
DNA	-12.501204, 130.979095
EMMA	40.446838, -3.714000
MADJ	32.655411, -16.911818
ON	23.613331, 58.593330
FT	43.778660, 11.260010
CORD	-31.383123, -64.201546
RBR	-22.742641, -43.706375
NU	-29.62575, 30.40286
CORD	-31.383123, -64.201546
CORD	-31.383123, -64.201546
R	-22.901070, -43.218620
PRC	50.071247, 14.419740
STRI	8.962998, -79.543706
WNU	26.901257, 111.461487
ECUAMZ	-1.4823023, -78.0020714
BOL	-33.956640, 18.461530
FAR	35.70435, 51.426457
LE	59.916740, 30.289980
LE	59.916740, 30.289980
NAC	36.703659, 138.175354
GZU	47.081249, 15.459499
GZU	47.081249, 15.459499
HAJB	22.995172, -82.339325
HAJB	22.995172, -82.339325
BP	47.476372, 19.099058
FLOR	-27.601561, -48.532417
BSD	30.341999, 78.016388
PRC	50.071247, 14.419740
O	59.882641, 10.768130
GOET	51.536678, 9.934580
KH	37.779579, 127.163383
KH	37.779579, 127.163383
CUFH	39.721165, 37.022888
KRAM	50.065483, 19.955404
KRAM	50.065483, 19.955404
KRAM	50.065483, 19.955404
BRY	40.251541, -111.653053
BRY	40.251541, -111.653053
USJ	9.937703, -84.049483
USJ	9.937703, -84.049483
KRAM	50.065483, 19.955404
SIB	45.785648, 24.137083
OKAY	34.696590, 133.927017
BH	42.448947, -76.476254
S	59.366455, 18.056282
UPRRP	18.462069, -66.097923
PR	50.090128, 14.433294
B	52.458278,13.30486
IMM	40.054586, 116.328428
SRFA	-36.633976, -64.322357
EAP	14.091537, -87.198616
EAP	14.091537, -87.198616
S	59.366455, 18.056282
LMA	-26.005415, 32.446526
BISH	21.333268, -157.86981
IRAN	35.723712, 51.447966
DTE
WPH	49.054352, -113.911537
PRC	50.071247, 14.419740
TON	-21.207591, -175.198683
PUR	40.4236 , -86.9187
PUL	40.4236, -86.9187
OLD	53.151299, 8.168070
CCMH	46.8647833, -96.7709684
SAT	31.443472, -100.465935
BSA	25.459909, 81.854446
USZ	-17.80, -63.17
KRB	-6.597150, 106.793831
SARAT	51.543079, 45.998741
MNHN	23.138330, -82.364166
ECUAMZ	-1.4823023, -78.0020714
BHCB	-19.808043, -43.954781
PUN	30.342327, 76.438416
HUP	34.452000, 73.268997
TALE	44.798553, -0.587700
SPSF	-23.582151, -46.581985
BHO	39.308540, -82.100388
NBRC	35.332481, 139.992920
BP	47.476372, 19.099058
SJSU	37.334789, -121.884827
LJF	46.0525203, 14.4799376
BHCB	-19.808043, -43.954781
KRAM	50.065483, 19.955404
LMO	53.134369, 8.218975
BABY	60.590764, -134.895306
SLUBGH	27.465000, 68.594002
BASSA	45.766243, 11.736091
RON	-12.733734, -60.144820
CSPU	34.058666, -117.786484
ZAGR	45.8316251, 16.0295033
BBH	14.042974, 100.695007
AAU	56.165611, 10.200320
EVE
ARIZ	32.231312, -110.949837
LES	53.801543, -1.546851
SCFS	39.43552,-120.240507
LDS	53.807389, -1.556899
CPH	37.979557, -121.311134
GMNP	49.589508, -57.923462
NZFRI	-38.160409,176.264925
IJ	17.983070, -76.775711
CVRD	-19.381836, -40.070129
BAR	13.096959, -59.604027
KE	41.150352, -81.362503
TAR	40.474442, 17.236784
CDRI	26.854719, 80.957710
ECWP	33.007746, -4.093995
JROH	37.403439,-122.244953
NTUF	25.047760, 121.531853
HLUC	40.632645,15.805643
HLSD	41.931381, -84.630842
HUAZ	1.615740, -75.611870
NT	-23.713070, 133.883850
DUGAND
MKNH	42.002079, 21.474371
MNAV	45.549477,11.547639
FAA	-34.632927, -58.475323
CBS	52.093979, 5.114938
CLEMS	34.689861, -82.803459
VNM	10.752598, 106.671903
SCCN	8.185372,77.407651
NMLU	47.051216, 8.301525
SUWS	46.713123, -92.062668
UFACPZ	-9.974108, -67.808298
RBR	-22.742641, -43.706375
PORUN	40.811455, 14.342786
POR	40.811455, 14.342786
HUESBVC	-14.889356,-40.803637
JPB	-7.149277, -34.841839
NDA	46.853230, -96.798210
AIX	43.527931, 5.448820
NCY	48.662819, 6.155345
PAC	40.798325, -77.866188
HFLA	41.9136894, 12.4742943
CFIA	45.164894, -75.992378
MBM	-25.440862,-49.240039
MQU	-33.791733, 151.100922
ATHU	37.988125, 23.728739
UNIN	-23.822498, 29.732847
SFUV	49.275997,-122.913197
PICRC	7.33866, 134.46609
WASH	39.036930, -95.700447
MOT	27.332857, -82.57741
EPU
IVIC	10.347566,-67.025375
HGM	39.883999,4.272946
LPC	-34.930294, -57.954510
OKLA	36.12322, -97.07037
MIRR	2.835575, -60.682106
PMA	9.038990, -79.532600
MSI	14.650776, 121.068979
WET	42.711506, -92.456619
CBPF
ASUF	35.175480, -111.656227
RUHV	37.140526, -80.556808
BESA	47.232004, 6.031473
QCNE	-0.229675, -78.524612
BREG	47.409710, 9.737500
TAWES	38.985777, -76.503671
RESC	40.526402, -122.290779
ETON	51.491721,-0.607661
LUB	53.860119, 10.685100
AURO	12.009834, 79.812756
CMPR
MEXU	19.322994, -99.181137
MUHW	38.423426,-82.427209
ETNH	32.588593,-95.17948
ROST	54.082298, 12.177102
FARM	37.300442, -78.39718
FBCS	24.111473, -110.309395
ICEL	64.164879, -21.725323
NGBB	41.068001, 29.030720
PLU
KRB	-6.597150, 106.793831
ZPB	-23.043125, 29.911451
LSR	52.659378, -1.125396
IAUGH	35.222221, 52.340561
HSU	32.474590, -99.734848
EMC	42.247860, -83.626999
JOTR	34.127, -116.037
IBUG	20.695181, -103.431778
GAS	32.424179, -81.779892
GSW	32.058060, -84.219528
CAU
FUK	35.973289, 136.131348
NAVA	35.158405, -111.669922
H	60.171391, 24.931173
CTC	29.557934, 106.456479
V	48.421032, -123.371384
HURG	-32.044605, -52.078587
BASBG	47.558250, 7.580980
MY	10.238190, -67.570213
RUNYON	25.900684, -97.492310
JOTR	34.127, -116.037
GOET	51.536678, 9.934580
WNC	34.222814, -77.868395
OLYM	48.100958,-123.432669
NYS	42.664928, -73.818825
BAG	33.316101, 44.198299
BC	41.359089, 2.152070
I	47.166660, 27.599991
INEP	67.567897,33.410422
KHD	39.729885, -104.960365
DBG	39.729890, -104.960370
SWMT	35.15517, -89.9901
CHSC	39.731073,-121.845471
BHU	52.454254,13.473164
UBC	49.2758, -122.91315
OWU	40.267700, -83.105232
HRB	-12.976860, -38.480793
BLFU	-29.167772, 26.248554
MJG	49.983082, 8.232466
NMR	37.13325, 128.191341
KIP	-11.666670, 27.466669
MLGU
LNAU	48.582371, 39.328259
TASH	41.307838, 69.273018
LAE	-6.720422, 146.998808
KUS	37.498278, 127.062346
EAFM	-3.134937,-60.012949
BNM	7.336735, 134.476483
KPABG	67.480507, 34.269398
JYV	62.240391, 25.742640
MB	50.815880, 8.769537
UH	17.365910, 78.517891
PRC	50.071247, 14.419740
KAND	66.895058, 31.825449
NHMF	46.793446, 7.157408
KONL	47.660225, 9.174746
KUZ	55.335941, 86.166618
JOTR	34.127, -116.037
ADR	41.897320, -84.058350
JROH	37.403439,-122.244953
VNM	10.752598, 106.671903
BACH	-24.654510, 25.908590
UBC	49.2758, -122.91315
NIHHS	36.939795, 127.690109
ECWP	33.007746, -4.093995
TAA	58.355649,26.679469
MKNDC	42.007290, 21.495354
MCTC	47.119358, -88.554665
GUCM
DNAP	-12.442842,130.927082
[truncated: 374 more rows]
