# Supplementary material for: Trends in access of plant biodiversity data revealed by Google Analytics
Source: Biodivers Data J. 2014 Nov 11;(2):e1558. doi: 10.3897/BDJ.2.e1558 (PMC4238075; doi:10.3897/BDJ.2.e1558)
Supplement: Supplementary material 4 — Original start date total [file biodiversity_data_journal-2-e1558-s004.xlsx]

## Sheet: Sheet1
Project	Sessions	Average Page Views	Average User Duration (min)
CCH	433964	7.26	10:50:00
CNABH	21887	3.53	04:17:00
CNALH	104935	3.05	03:58:00
CoTRAM	10372	2.72	02:18:00
eFlora	5337829	4.61	03:59:00
FloraBase	1246269	8.4	07:22:00
GBIF	803552	3.99	03:08:00
HVAA	18177	2.4	01:44:00
Jepson	276009	5.98	09:21:00
LSU Keys	25891	2.77	04:26:00
ON	448014	1.93	01:42:00
Orowiki	17327	5.59	05:05:00
PNW	39261	6.22	07:54:00
SEINet	746408	4.69	04:56:00
Tropicos	7669081	12.64	12:57:00
