# Supplementary material for: Trends in access of plant biodiversity data revealed by Google Analytics
Source: Biodivers Data J. 2014 Nov 11;(2):e1558. doi: 10.3897/BDJ.2.e1558 (PMC4238075; doi:10.3897/BDJ.2.e1558)
Supplement: Supplementary material 7 — Bounce rate supplemental [file biodiversity_data_journal-2-e1558-s007.xlsx]

## Sheet: Sheet1
Project	2007	2008	2009	2010	2011	2012	2013	2014
CCH	26.25	29.77	27.15	27.75	31.26	31.42	30.29	30.75
eFlora				58.77	57.58	56.94	56.92	58.89
Jepson					34.46	43.2	44.78	47.22
LSU Keys			65.26	62.08	61.16	64.11	59.03	44.38
SEINet					51.19	52.11	52.71	56.49
Tropicos			25.77	27.21	24.43	31.13	33.99	33.82
