# Supplementary material for: Trends in access of plant biodiversity data revealed by Google Analytics
Source: Biodivers Data J. 2014 Nov 11;(2):e1558. doi: 10.3897/BDJ.2.e1558 (PMC4238075; doi:10.3897/BDJ.2.e1558)
Supplement: Supplementary material 8 — Long term – mobile and tablet combined percentage of all traffic [file biodiversity_data_journal-2-e1558-s008.xlsx]

## Sheet: Sheet1
Year	CCH	eFlora	FloraBase	GBIF	Jepson	LSU Keys	PNW	SEINet	Tropicos
2010	0.26	0.26				0.26			0.02
2011	0.64	0.64			1.37	0.64		0.45	0.1
2012	1.91	1.91	2.56		4.38	1.91		1.15	0.44
2013	3.61	3.61	5.09		7.22	9.64	2.91	2.26	1.36
2014	6.96	6.96	8.97	7.74	9.92	13.2	4.6	5.55	2.86
LONG TERM - Mobile and Tablet combined percentage of all traffic
Years are from January 01 (or start date of that year) to January 01
