# Supplementary material for: Trends in access of plant biodiversity data revealed by Google Analytics
Source: Biodivers Data J. 2014 Nov 11;(2):e1558. doi: 10.3897/BDJ.2.e1558 (PMC4238075; doi:10.3897/BDJ.2.e1558)
Supplement: Supplementary material 9 — Short-term – traffic by device type [file biodiversity_data_journal-2-e1558-s009.xlsx]

## Sheet: Sheet1
Project	Search	Direct	Referrals	(not set)	Social
CCH	21.31	28.99	32.34	17	0.27
eFlora	49.52	10.11	23.29	16.76	0.32
FloraBase	59.1	12.77	10.64	16.63	0.86
GBIF	78.49	12.35	7.98	0.09	1.08
Jepson	37.41	23.51	24.64	14.07	0.34
LSU Keys	32.24	39.27	10.41	9.54	8.54
PNW	35.4	29.74	20.39	13.59	0.88
SEINet	55.31	11.61	15.17	17.62	0.28
Tropicos	44.27	21.15	18.11	16.04	0.43
SHORT-TERM- Traffic by device type from January 01, 2013- January 01, 2014
