# Supplementary material for: Trends in access of plant biodiversity data revealed by Google Analytics
Source: Biodivers Data J. 2014 Nov 11;(2):e1558. doi: 10.3897/BDJ.2.e1558 (PMC4238075; doi:10.3897/BDJ.2.e1558)
Supplement: Supplementary material 10 — Long and short term operating systems [file biodiversity_data_journal-2-e1558-s010.xlsx]

## Sheet: Sheet1
LONG TERM OS'ES from inception
Project	Windows	Macintosh	Linux	iOS	Android
CCH	64.89	32.51	0.62	1.04	0.4
CNABH	81.63	13.28	1.09	2.66	0.89
CNALH	79.96	13.62	1.61	3.15	1.27
CoTRAM	89.44	5.41	1.47	1.33	1.2
eFlora	83.78	9.63	2.01	1.7	1.16
FloraBase	78.39	13.8	0.62	4.18	1.64
GBIF	79.19	11.34	1.65	3.65	2.78
HVAA	89.72	7	1.43	0.74	0.73
Jepson	67.12	25.31	0.52	4.12	1.74
LSU Keys	79.06	12.44	1.01	2.44	2.99
ON	68.69	6.2	2.41	10.41	11.41
Orowiki	78.7	7.28	10.35	1.42	1.34
PNW	72.6	21.62	0.65	3.02	1.68
SEINet	78.7	15.95	1.03	2.15	1.12
Tropicos	86.94	10.74	1.02	0.58	0.49
LONG TERM OS'ES JAN 01 2013 - JAN 01 2014 SHORT TERM
Project	Windows	Macintosh	Linux	iOS	Android
CCH	60.1	34.89	0.76	3.5	0.68
CNABH	81.32	13.07	1.2	3.13	0.9
CNALH	79.76	13.52	1.79	3.36	1.22
CoTRAM	88.33	5.23	1.28	1.91	1.98
eFlora	80.92	9.73	1.31	3.93	2.28
FloraBase	76.07	13.99	0.73	6.45	2.14
GBIF	78.52	11.87	1.63	3.87	2.63
HVAA	89.2	6.35	1.72	1.09	1.34
Jepson	67.88	22.89	0.54	5.87	2.3
LSU Keys	70.71	15.4	0.75	5.58	7.21
ON	65.72	6.08	2.23	12.16	13.35
Orowiki	76.34	6.93	11.61	2.39	1.66
PNW	73.91	20.76	0.56	2.85	1.58
SEINet	76.96	16.21	0.97	3.56	1.59
Tropicos	85.46	10.66	1.32	1.32	0.99
