# Supplementary material for: Trends in access of plant biodiversity data revealed by Google Analytics
Source: Biodivers Data J. 2014 Nov 11;(2):e1558. doi: 10.3897/BDJ.2.e1558 (PMC4238075; doi:10.3897/BDJ.2.e1558)
Supplement: Supplementary material 14 — Search, direct, referrals, and social [file biodiversity_data_journal-2-e1558-s014.xlsx]

## Sheet: Sheet1
Project	Search	Direct	Referrals	(not set)	Social
CCH	21.31	28.99	32.34	17	0.27
CNABH
CNALH
COTRAM
eFlora	49.52	10.11	23.29	16.76	0.32
FloraBase	59.1	12.77	10.64	16.63	0.86
GBIF	78.49	12.35	7.98	0.09	1.08
HVAA
Jepson	37.41	23.51	24.64	14.07	0.34
LSU Keys	32.24	39.27	10.41	9.54	8.54
ON
Orowiki
PNW	35.4	29.74	20.39	13.59	0.88
SEINet	55.31	11.61	15.17	17.62	0.28
Tropicos	44.27	21.15	18.11	16.04	0.43
