# Supplementary material for: Trends in access of plant biodiversity data revealed by Google Analytics
Source: Biodivers Data J. 2014 Nov 11;(2):e1558. doi: 10.3897/BDJ.2.e1558 (PMC4238075; doi:10.3897/BDJ.2.e1558)
Supplement: Supplementary material 15 — Tropicos by year for language 3 [file biodiversity_data_journal-2-e1558-s015.pdf]

Language

Jun 1, 2009 - Jun 1, 2010

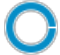 All Sessions  
100.00%

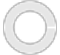 + Add Segment

Explorer

Summary

| Language                   | Acquisition                                 |                                          |                                             | Behavior                                 |                                        |                                              | Conversions                         |                               |                                         |
|----------------------------|---------------------------------------------|------------------------------------------|---------------------------------------------|------------------------------------------|----------------------------------------|----------------------------------------------|-------------------------------------|-------------------------------|-----------------------------------------|
|                            | Sessions                                    | % New Sessions                           | New Users                                   | Bounce Rate                              | Pages / Session                        | Avg. Session Duration                        | Goal Conversion Rate                | Goal Completions              | Goal Value                              |
|                            | 907,669<br>% of Total:<br>100.00% (907,669) | 25.72%<br>Site Avg:<br>25.66%<br>(0.20%) | 233,415<br>% of Total:<br>100.20% (232,953) | 26.14%<br>Site Avg:<br>26.14%<br>(0.00%) | 14.47<br>Site Avg:<br>14.47<br>(0.00%) | 00:14:50<br>Site Avg:<br>00:14:50<br>(0.00%) | 0.00%<br>Site Avg:<br>0.00% (0.00%) | 0<br>% of Total:<br>0.00% (0) | \$0.00<br>% of Total:<br>0.00% (\$0.00) |
| 1. <a href="#">en-us</a>   | 342,807 (37.77%)                            | 29.93%                                   | 102,617 (43.96%)                            | 31.54%                                   | 14.11                                  | 00:13:31                                     | 0.00%                               | 0 (0.00%)                     | \$0.00 (0.00%)                          |
| 2. <a href="#">es</a>      | 157,127 (17.31%)                            | 22.01%                                   | 34,582 (14.82%)                             | 19.42%                                   | 16.77                                  | 00:16:45                                     | 0.00%                               | 0 (0.00%)                     | \$0.00 (0.00%)                          |
| 3. <a href="#">pt-br</a>   | 132,187 (14.56%)                            | 25.09%                                   | 33,170 (14.21%)                             | 20.45%                                   | 12.96                                  | 00:14:37                                     | 0.00%                               | 0 (0.00%)                     | \$0.00 (0.00%)                          |
| 4. <a href="#">es-es</a>   | 63,197 (6.96%)                              | 20.27%                                   | 12,812 (5.49%)                              | 26.33%                                   | 16.39                                  | 00:15:39                                     | 0.00%                               | 0 (0.00%)                     | \$0.00 (0.00%)                          |
| 5. <a href="#">fr</a>      | 51,488 (5.67%)                              | 18.05%                                   | 9,294 (3.98%)                               | 19.37%                                   | 16.20                                  | 00:21:08                                     | 0.00%                               | 0 (0.00%)                     | \$0.00 (0.00%)                          |
| 6. <a href="#">de</a>      | 31,762 (3.50%)                              | 26.60%                                   | 8,450 (3.62%)                               | 25.69%                                   | 12.50                                  | 00:14:58                                     | 0.00%                               | 0 (0.00%)                     | \$0.00 (0.00%)                          |
| 7. <a href="#">en-gb</a>   | 15,240 (1.68%)                              | 21.64%                                   | 3,298 (1.41%)                               | 26.42%                                   | 12.59                                  | 00:13:07                                     | 0.00%                               | 0 (0.00%)                     | \$0.00 (0.00%)                          |
| 8. <a href="#">zh-cn</a>   | 13,297 (1.46%)                              | 17.59%                                   | 2,339 (1.00%)                               | 17.12%                                   | 14.60                                  | 00:16:52                                     | 0.00%                               | 0 (0.00%)                     | \$0.00 (0.00%)                          |
| 9. <a href="#">en</a>      | 10,709 (1.18%)                              | 17.90%                                   | 1,917 (0.82%)                               | 38.37%                                   | 10.48                                  | 00:12:05                                     | 0.00%                               | 0 (0.00%)                     | \$0.00 (0.00%)                          |
| 10. <a href="#">es-ar</a>  | 9,361 (1.03%)                               | 21.46%                                   | 2,009 (0.86%)                               | 24.23%                                   | 15.01                                  | 00:16:26                                     | 0.00%                               | 0 (0.00%)                     | \$0.00 (0.00%)                          |
| 11. <a href="#">ru</a>     | 9,020 (0.99%)                               | 55.08%                                   | 4,968 (2.13%)                               | 49.14%                                   | 6.32                                   | 00:05:56                                     | 0.00%                               | 0 (0.00%)                     | \$0.00 (0.00%)                          |
| 12. <a href="#">zh-tw</a>  | 8,828 (0.97%)                               | 15.73%                                   | 1,389 (0.60%)                               | 32.68%                                   | 8.18                                   | 00:11:25                                     | 0.00%                               | 0 (0.00%)                     | \$0.00 (0.00%)                          |
| 13. <a href="#">it</a>     | 8,082 (0.89%)                               | 27.73%                                   | 2,241 (0.96%)                               | 21.89%                                   | 21.92                                  | 00:17:13                                     | 0.00%                               | 0 (0.00%)                     | \$0.00 (0.00%)                          |
| 14. <a href="#">nl</a>     | 5,349 (0.59%)                               | 28.29%                                   | 1,513 (0.65%)                               | 30.70%                                   | 13.31                                  | 00:10:06                                     | 0.00%                               | 0 (0.00%)                     | \$0.00 (0.00%)                          |
| 15. <a href="#">es-419</a> | 5,148 (0.57%)                               | 17.00%                                   | 875 (0.37%)                                 | 18.92%                                   | 14.85                                  | 00:18:05                                     | 0.00%                               | 0 (0.00%)                     | \$0.00 (0.00%)                          |
| 16. <a href="#">ko</a>     | 5,075 (0.56%)                               | 22.92%                                   | 1,163 (0.50%)                               | 21.34%                                   | 10.13                                  | 00:11:54                                     | 0.00%                               | 0 (0.00%)                     | \$0.00 (0.00%)                          |
| 17. <a href="#">pl</a>     | 4,955 (0.55%)                               | 26.84%                                   | 1,330 (0.57%)                               | 34.15%                                   | 10.98                                  | 00:10:46                                     | 0.00%                               | 0 (0.00%)                     | \$0.00 (0.00%)                          |
| 18. <a href="#">ja</a>     | 4,706 (0.52%)                               | 34.32%                                   | 1,615 (0.69%)                               | 22.55%                                   | 10.28                                  | 00:09:41                                     | 0.00%                               | 0 (0.00%)                     | \$0.00 (0.00%)                          |
| 19. <a href="#">fr-fr</a>  | 3,693 (0.41%)                               | 8.10%                                    | 299 (0.13%)                                 | 30.73%                                   | 17.41                                  | 00:14:19                                     | 0.00%                               | 0 (0.00%)                     | \$0.00 (0.00%)                          |
| 20. <a href="#">sv-se</a>  | 2,694 (0.30%)                               | 10.54%                                   | 284 (0.12%)                                 | 15.59%                                   | 9.72                                   | 00:13:25                                     | 0.00%                               | 0 (0.00%)                     | \$0.00 (0.00%)                          |
| 21. <a href="#">sv</a>     | 2,681 (0.30%)                               | 20.59%                                   | 552 (0.24%)                                 | 24.84%                                   | 10.31                                  | 00:12:26                                     | 0.00%                               | 0 (0.00%)                     | \$0.00 (0.00%)                          |
| 22. <a href="#">cs</a>     | 2,396 (0.26%)                               | 40.40%                                   | 968 (0.41%)                                 | 31.89%                                   | 12.19                                  | 00:11:51                                     | 0.00%                               | 0 (0.00%)                     | \$0.00 (0.00%)                          |
| 23. <a href="#">de-de</a>  | 1,935 (0.21%)                               | 21.65%                                   | 419 (0.18%)                                 | 24.81%                                   | 16.43                                  | 00:13:14                                     | 0.00%                               | 0 (0.00%)                     | \$0.00 (0.00%)                          |
| 24. <a href="#">es-mx</a>  | 1,716 (0.19%)                               | 16.72%                                   | 287 (0.12%)                                 | 20.80%                                   | 17.02                                  | 00:17:21                                     | 0.00%                               | 0 (0.00%)                     | \$0.00 (0.00%)                          |
| 25. <a href="#">pt</a>     | 1,462 (0.16%)                               | 41.86%                                   | 612 (0.26%)                                 | 31.40%                                   | 12.88                                  | 00:11:54                                     | 0.00%                               | 0 (0.00%)                     | \$0.00 (0.00%)                          |
| 26. <a href="#">pt-pt</a>  | 1,254 (0.14%)                               | 37.08%                                   | 465 (0.20%)                                 | 33.01%                                   | 8.93                                   | 00:09:27                                     | 0.00%                               | 0 (0.00%)                     | \$0.00 (0.00%)                          |

|     |              |               |        |             |        |       |          |       |           |                |
|-----|--------------|---------------|--------|-------------|--------|-------|----------|-------|-----------|----------------|
| 27. | tr           | 1,134 (0.12%) | 46.65% | 529 (0.23%) | 36.07% | 9.60  | 00:07:14 | 0.00% | 0 (0.00%) | \$0.00 (0.00%) |
| 28. | ca           | 1,072 (0.12%) | 10.17% | 109 (0.05%) | 30.32% | 12.58 | 00:14:01 | 0.00% | 0 (0.00%) | \$0.00 (0.00%) |
| 29. | ja-jp        | 908 (0.10%)   | 13.11% | 119 (0.05%) | 37.33% | 12.35 | 00:13:41 | 0.00% | 0 (0.00%) | \$0.00 (0.00%) |
| 30. | da           | 891 (0.10%)   | 36.70% | 327 (0.14%) | 28.73% | 8.70  | 00:06:24 | 0.00% | 0 (0.00%) | \$0.00 (0.00%) |
| 31. | fr-ca        | 736 (0.08%)   | 0.82%  | 6 (0.00%)   | 5.71%  | 98.96 | 01:14:50 | 0.00% | 0 (0.00%) | \$0.00 (0.00%) |
| 32. | ja-jp-mac    | 641 (0.07%)   | 16.07% | 103 (0.04%) | 12.17% | 49.65 | 00:26:23 | 0.00% | 0 (0.00%) | \$0.00 (0.00%) |
| 33. | es-xl        | 621 (0.07%)   | 0.97%  | 6 (0.00%)   | 24.96% | 15.09 | 00:21:56 | 0.00% | 0 (0.00%) | \$0.00 (0.00%) |
| 34. | el           | 562 (0.06%)   | 46.26% | 260 (0.11%) | 38.43% | 5.85  | 00:03:10 | 0.00% | 0 (0.00%) | \$0.00 (0.00%) |
| 35. | hu           | 495 (0.05%)   | 77.37% | 383 (0.16%) | 63.23% | 3.20  | 00:01:25 | 0.00% | 0 (0.00%) | \$0.00 (0.00%) |
| 36. | es-la        | 381 (0.04%)   | 21.52% | 82 (0.04%)  | 37.53% | 9.37  | 00:22:50 | 0.00% | 0 (0.00%) | \$0.00 (0.00%) |
| 37. | fi           | 369 (0.04%)   | 48.78% | 180 (0.08%) | 30.35% | 10.55 | 00:06:37 | 0.00% | 0 (0.00%) | \$0.00 (0.00%) |
| 38. | no           | 316 (0.03%)   | 37.66% | 119 (0.05%) | 35.13% | 5.86  | 00:05:46 | 0.00% | 0 (0.00%) | \$0.00 (0.00%) |
| 39. | sk           | 314 (0.03%)   | 57.96% | 182 (0.08%) | 62.10% | 4.75  | 00:03:11 | 0.00% | 0 (0.00%) | \$0.00 (0.00%) |
| 40. | it-it        | 297 (0.03%)   | 25.93% | 77 (0.03%)  | 27.27% | 11.89 | 00:13:58 | 0.00% | 0 (0.00%) | \$0.00 (0.00%) |
| 41. | de-at        | 291 (0.03%)   | 63.23% | 184 (0.08%) | 6.53%  | 8.41  | 00:11:49 | 0.00% | 0 (0.00%) | \$0.00 (0.00%) |
| 42. | th           | 244 (0.03%)   | 27.46% | 67 (0.03%)  | 24.59% | 9.76  | 00:09:29 | 0.00% | 0 (0.00%) | \$0.00 (0.00%) |
| 43. | id           | 214 (0.02%)   | 48.60% | 104 (0.04%) | 33.64% | 8.06  | 00:14:49 | 0.00% | 0 (0.00%) | \$0.00 (0.00%) |
| 44. | nb-no        | 203 (0.02%)   | 24.63% | 50 (0.02%)  | 72.41% | 2.45  | 00:02:04 | 0.00% | 0 (0.00%) | \$0.00 (0.00%) |
| 45. | nl-nl        | 150 (0.02%)   | 32.00% | 48 (0.02%)  | 26.00% | 7.88  | 00:06:17 | 0.00% | 0 (0.00%) | \$0.00 (0.00%) |
| 46. | et           | 133 (0.01%)   | 62.41% | 83 (0.04%)  | 51.13% | 2.86  | 00:01:30 | 0.00% | 0 (0.00%) | \$0.00 (0.00%) |
| 47. | bg           | 122 (0.01%)   | 71.31% | 87 (0.04%)  | 54.92% | 3.37  | 00:01:45 | 0.00% | 0 (0.00%) | \$0.00 (0.00%) |
| 48. | es-cl        | 120 (0.01%)   | 32.50% | 39 (0.02%)  | 25.00% | 14.90 | 00:16:24 | 0.00% | 0 (0.00%) | \$0.00 (0.00%) |
| 49. | lt           | 104 (0.01%)   | 70.19% | 73 (0.03%)  | 63.46% | 3.76  | 00:02:25 | 0.00% | 0 (0.00%) | \$0.00 (0.00%) |
| 50. | sl           | 104 (0.01%)   | 64.42% | 67 (0.03%)  | 75.96% | 3.16  | 00:01:13 | 0.00% | 0 (0.00%) | \$0.00 (0.00%) |
| 51. | ro           | 93 (0.01%)    | 70.97% | 66 (0.03%)  | 51.61% | 6.83  | 00:05:33 | 0.00% | 0 (0.00%) | \$0.00 (0.00%) |
| 52. | he           | 88 (0.01%)    | 78.41% | 69 (0.03%)  | 63.64% | 2.15  | 00:01:05 | 0.00% | 0 (0.00%) | \$0.00 (0.00%) |
| 53. | zh-hk        | 73 (0.01%)    | 56.16% | 41 (0.02%)  | 46.58% | 17.44 | 00:06:10 | 0.00% | 0 (0.00%) | \$0.00 (0.00%) |
| 54. | ar-sa        | 61 (0.01%)    | 83.61% | 51 (0.02%)  | 54.10% | 3.97  | 00:02:41 | 0.00% | 0 (0.00%) | \$0.00 (0.00%) |
| 55. | ru-ru        | 57 (0.01%)    | 78.95% | 45 (0.02%)  | 63.16% | 2.23  | 00:03:13 | 0.00% | 0 (0.00%) | \$0.00 (0.00%) |
| 56. | pt_br        | 56 (0.01%)    | 10.71% | 6 (0.00%)   | 12.50% | 9.20  | 00:12:01 | 0.00% | 0 (0.00%) | \$0.00 (0.00%) |
| 57. | uk           | 49 (0.01%)    | 73.47% | 36 (0.02%)  | 46.94% | 3.27  | 00:02:43 | 0.00% | 0 (0.00%) | \$0.00 (0.00%) |
| 58. | pl-pl        | 44 (0.00%)    | 54.55% | 24 (0.01%)  | 59.09% | 4.91  | 00:01:38 | 0.00% | 0 (0.00%) | \$0.00 (0.00%) |
| 59. | vi           | 44 (0.00%)    | 50.00% | 22 (0.01%)  | 40.91% | 15.48 | 00:09:16 | 0.00% | 0 (0.00%) | \$0.00 (0.00%) |
| 60. | cs-cz        | 41 (0.00%)    | 43.90% | 18 (0.01%)  | 26.83% | 22.71 | 00:14:15 | 0.00% | 0 (0.00%) | \$0.00 (0.00%) |
| 61. | lv           | 40 (0.00%)    | 52.50% | 21 (0.01%)  | 37.50% | 3.82  | 00:02:48 | 0.00% | 0 (0.00%) | \$0.00 (0.00%) |
| 62. | gl           | 39 (0.00%)    | 20.51% | 8 (0.00%)   | 25.64% | 13.44 | 00:29:19 | 0.00% | 0 (0.00%) | \$0.00 (0.00%) |
| 63. | th-th        | 34 (0.00%)    | 20.59% | 7 (0.00%)   | 44.12% | 5.71  | 00:10:45 | 0.00% | 0 (0.00%) | \$0.00 (0.00%) |
| 64. | hr           | 31 (0.00%)    | 93.55% | 29 (0.01%)  | 64.52% | 2.42  | 00:01:20 | 0.00% | 0 (0.00%) | \$0.00 (0.00%) |
| 65. | pt-br; alexa | 30 (0.00%)    | 60.00% | 18 (0.01%)  | 20.00% | 10.50 | 00:13:39 | 0.00% | 0 (0.00%) | \$0.00 (0.00%) |
| 66. | (not set)    | 29 (0.00%)    | 82.76% | 24 (0.01%)  | 24.14% | 9.52  | 00:10:57 | 0.00% | 0 (0.00%) | \$0.00 (0.00%) |

|      |                                       |                   |         |                   |         |       |          |       |                  |                       |
|------|---------------------------------------|-------------------|---------|-------------------|---------|-------|----------|-------|------------------|-----------------------|
| 67.  | <a href="#">hu-hu</a>                 | <b>27</b> (0.00%) | 40.74%  | <b>11</b> (0.00%) | 29.63%  | 5.70  | 00:04:06 | 0.00% | <b>0</b> (0.00%) | <b>\$0.00</b> (0.00%) |
| 68.  | <a href="#">ko-kr</a>                 | <b>25</b> (0.00%) | 32.00%  | <b>8</b> (0.00%)  | 44.00%  | 9.32  | 00:07:59 | 0.00% | <b>0</b> (0.00%) | <b>\$0.00</b> (0.00%) |
| 69.  | <a href="#">fi-fi</a>                 | <b>23</b> (0.00%) | 73.91%  | <b>17</b> (0.01%) | 39.13%  | 3.87  | 00:02:51 | 0.00% | <b>0</b> (0.00%) | <b>\$0.00</b> (0.00%) |
| 70.  | <a href="#">sr</a>                    | <b>20</b> (0.00%) | 85.00%  | <b>17</b> (0.01%) | 80.00%  | 1.60  | 00:00:36 | 0.00% | <b>0</b> (0.00%) | <b>\$0.00</b> (0.00%) |
| 71.  | <a href="#">da-dk</a>                 | <b>17</b> (0.00%) | 70.59%  | <b>12</b> (0.01%) | 47.06%  | 4.47  | 00:01:17 | 0.00% | <b>0</b> (0.00%) | <b>\$0.00</b> (0.00%) |
| 72.  | <a href="#">ar</a>                    | <b>15</b> (0.00%) | 66.67%  | <b>10</b> (0.00%) | 73.33%  | 3.73  | 00:01:46 | 0.00% | <b>0</b> (0.00%) | <b>\$0.00</b> (0.00%) |
| 73.  | <a href="#">el-gr</a>                 | <b>14</b> (0.00%) | 14.29%  | <b>2</b> (0.00%)  | 85.71%  | 2.93  | 00:05:03 | 0.00% | <b>0</b> (0.00%) | <b>\$0.00</b> (0.00%) |
| 74.  | <a href="#">mn</a>                    | <b>14</b> (0.00%) | 57.14%  | <b>8</b> (0.00%)  | 28.57%  | 3.00  | 00:04:20 | 0.00% | <b>0</b> (0.00%) | <b>\$0.00</b> (0.00%) |
| 75.  | <a href="#">en_us</a>                 | <b>11</b> (0.00%) | 90.91%  | <b>10</b> (0.00%) | 63.64%  | 2.18  | 00:01:17 | 0.00% | <b>0</b> (0.00%) | <b>\$0.00</b> (0.00%) |
| 76.  | <a href="#">mk</a>                    | <b>11</b> (0.00%) | 45.45%  | <b>5</b> (0.00%)  | 81.82%  | 1.18  | 00:00:02 | 0.00% | <b>0</b> (0.00%) | <b>\$0.00</b> (0.00%) |
| 77.  | <a href="#">nb</a>                    | <b>11</b> (0.00%) | 90.91%  | <b>10</b> (0.00%) | 63.64%  | 2.27  | 00:00:19 | 0.00% | <b>0</b> (0.00%) | <b>\$0.00</b> (0.00%) |
| 78.  | <a href="#">en-ca</a>                 | <b>9</b> (0.00%)  | 77.78%  | <b>7</b> (0.00%)  | 66.67%  | 9.33  | 00:10:00 | 0.00% | <b>0</b> (0.00%) | <b>\$0.00</b> (0.00%) |
| 79.  | <a href="#">de-ch</a>                 | <b>6</b> (0.00%)  | 50.00%  | <b>3</b> (0.00%)  | 33.33%  | 5.00  | 00:01:25 | 0.00% | <b>0</b> (0.00%) | <b>\$0.00</b> (0.00%) |
| 80.  | <a href="#">et-ee</a>                 | <b>6</b> (0.00%)  | 100.00% | <b>6</b> (0.00%)  | 66.67%  | 2.00  | 00:00:15 | 0.00% | <b>0</b> (0.00%) | <b>\$0.00</b> (0.00%) |
| 81.  | <a href="#">eu</a>                    | <b>6</b> (0.00%)  | 83.33%  | <b>5</b> (0.00%)  | 66.67%  | 2.17  | 00:00:13 | 0.00% | <b>0</b> (0.00%) | <b>\$0.00</b> (0.00%) |
| 82.  | <a href="#">c</a>                     | <b>4</b> (0.00%)  | 100.00% | <b>4</b> (0.00%)  | 100.00% | 1.00  | 00:00:00 | 0.00% | <b>0</b> (0.00%) | <b>\$0.00</b> (0.00%) |
| 83.  | <a href="#">fil</a>                   | <b>4</b> (0.00%)  | 100.00% | <b>4</b> (0.00%)  | 25.00%  | 5.50  | 00:02:27 | 0.00% | <b>0</b> (0.00%) | <b>\$0.00</b> (0.00%) |
| 84.  | <a href="#">is</a>                    | <b>3</b> (0.00%)  | 100.00% | <b>3</b> (0.00%)  | 66.67%  | 3.67  | 00:03:32 | 0.00% | <b>0</b> (0.00%) | <b>\$0.00</b> (0.00%) |
| 85.  | <a href="#">sk-sk</a>                 | <b>3</b> (0.00%)  | 100.00% | <b>3</b> (0.00%)  | 33.33%  | 2.67  | 00:00:48 | 0.00% | <b>0</b> (0.00%) | <b>\$0.00</b> (0.00%) |
| 86.  | <a href="#">sq</a>                    | <b>3</b> (0.00%)  | 66.67%  | <b>2</b> (0.00%)  | 33.33%  | 4.33  | 00:00:58 | 0.00% | <b>0</b> (0.00%) | <b>\$0.00</b> (0.00%) |
| 87.  | <a href="#">af</a>                    | <b>2</b> (0.00%)  | 50.00%  | <b>1</b> (0.00%)  | 50.00%  | 7.50  | 00:01:41 | 0.00% | <b>0</b> (0.00%) | <b>\$0.00</b> (0.00%) |
| 88.  | <a href="#">ca-es</a>                 | <b>2</b> (0.00%)  | 100.00% | <b>2</b> (0.00%)  | 50.00%  | 1.50  | 00:00:23 | 0.00% | <b>0</b> (0.00%) | <b>\$0.00</b> (0.00%) |
| 89.  | <a href="#">en-au</a>                 | <b>2</b> (0.00%)  | 100.00% | <b>2</b> (0.00%)  | 50.00%  | 2.50  | 00:00:14 | 0.00% | <b>0</b> (0.00%) | <b>\$0.00</b> (0.00%) |
| 90.  | <a href="#">en-br; alexa</a>          | <b>2</b> (0.00%)  | 100.00% | <b>2</b> (0.00%)  | 50.00%  | 2.50  | 00:00:32 | 0.00% | <b>0</b> (0.00%) | <b>\$0.00</b> (0.00%) |
| 91.  | <a href="#">en-us; megaupload 1.0</a> | <b>2</b> (0.00%)  | 50.00%  | <b>1</b> (0.00%)  | 50.00%  | 20.50 | 00:05:27 | 0.00% | <b>0</b> (0.00%) | <b>\$0.00</b> (0.00%) |
| 92.  | <a href="#">he-il</a>                 | <b>2</b> (0.00%)  | 50.00%  | <b>1</b> (0.00%)  | 50.00%  | 2.00  | 00:00:44 | 0.00% | <b>0</b> (0.00%) | <b>\$0.00</b> (0.00%) |
| 93.  | <a href="#">hi-in</a>                 | <b>2</b> (0.00%)  | 50.00%  | <b>1</b> (0.00%)  | 0.00%   | 2.50  | 00:00:53 | 0.00% | <b>0</b> (0.00%) | <b>\$0.00</b> (0.00%) |
| 94.  | <a href="#">nn</a>                    | <b>2</b> (0.00%)  | 50.00%  | <b>1</b> (0.00%)  | 50.00%  | 13.00 | 00:02:47 | 0.00% | <b>0</b> (0.00%) | <b>\$0.00</b> (0.00%) |
| 95.  | <a href="#">sr-ba-latn</a>            | <b>2</b> (0.00%)  | 50.00%  | <b>1</b> (0.00%)  | 50.00%  | 2.50  | 00:00:53 | 0.00% | <b>0</b> (0.00%) | <b>\$0.00</b> (0.00%) |
| 96.  | <a href="#">tr-tr</a>                 | <b>2</b> (0.00%)  | 100.00% | <b>2</b> (0.00%)  | 50.00%  | 4.00  | 00:00:45 | 0.00% | <b>0</b> (0.00%) | <b>\$0.00</b> (0.00%) |
| 97.  | <a href="#">uk-ua</a>                 | <b>2</b> (0.00%)  | 100.00% | <b>2</b> (0.00%)  | 100.00% | 1.00  | 00:00:00 | 0.00% | <b>0</b> (0.00%) | <b>\$0.00</b> (0.00%) |
| 98.  | <a href="#">be</a>                    | <b>1</b> (0.00%)  | 100.00% | <b>1</b> (0.00%)  | 0.00%   | 2.00  | 00:01:23 | 0.00% | <b>0</b> (0.00%) | <b>\$0.00</b> (0.00%) |
| 99.  | <a href="#">bn-bd</a>                 | <b>1</b> (0.00%)  | 100.00% | <b>1</b> (0.00%)  | 100.00% | 1.00  | 00:00:00 | 0.00% | <b>0</b> (0.00%) | <b>\$0.00</b> (0.00%) |
| 100. | <a href="#">ca-ad</a>                 | <b>1</b> (0.00%)  | 100.00% | <b>1</b> (0.00%)  | 0.00%   | 12.00 | 00:28:54 | 0.00% | <b>0</b> (0.00%) | <b>\$0.00</b> (0.00%) |
