# Supplementary material for: Trends in access of plant biodiversity data revealed by Google Analytics
Source: Biodivers Data J. 2014 Nov 11;(2):e1558. doi: 10.3897/BDJ.2.e1558 (PMC4238075; doi:10.3897/BDJ.2.e1558)
Supplement: Supplementary material 18 — Tropicos by year for language [file biodiversity_data_journal-2-e1558-s018.pdf]

Language

Jun 1, 2012 - Jun 1, 2013

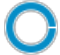 All Sessions  
100.00%

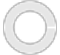 + Add Segment

Explorer

Summary

| Language                  | Acquisition                                     |                                       |                                          | Behavior                              |                                     |                                        | Conversions                         |                            |                                      |
|---------------------------|-------------------------------------------------|---------------------------------------|------------------------------------------|---------------------------------------|-------------------------------------|----------------------------------------|-------------------------------------|----------------------------|--------------------------------------|
|                           | Sessions                                        | % New Sessions                        | New Users                                | Bounce Rate                           | Pages / Session                     | Avg. Session Duration                  | Goal Conversion Rate                | Goal Completions           | Goal Value                           |
|                           | 1,578,586<br>% of Total: 100.00%<br>(1,578,586) | 30.63%<br>Site Avg: 30.58%<br>(0.17%) | 483,567<br>% of Total: 100.17% (482,754) | 33.18%<br>Site Avg: 33.18%<br>(0.00%) | 12.04<br>Site Avg: 12.04<br>(0.00%) | 00:12:20<br>Site Avg: 00:12:20 (0.00%) | 0.00%<br>Site Avg: 0.00%<br>(0.00%) | 0<br>% of Total: 0.00% (0) | \$0.00<br>% of Total: 0.00% (\$0.00) |
| 1. <a href="#">en-us</a>  | 550,095 (34.85%)                                | 33.95%                                | 186,745 (38.62%)                         | 37.26%                                | 12.07                               | 00:11:28                               | 0.00%                               | 0 (0.00%)                  | \$0.00 (0.00%)                       |
| 2. <a href="#">es</a>     | 294,913 (18.68%)                                | 28.69%                                | 84,603 (17.50%)                          | 26.17%                                | 14.56                               | 00:15:08                               | 0.00%                               | 0 (0.00%)                  | \$0.00 (0.00%)                       |
| 3. <a href="#">pt-br</a>  | 180,046 (11.41%)                                | 26.78%                                | 48,221 (9.97%)                           | 26.08%                                | 10.66                               | 00:11:58                               | 0.00%                               | 0 (0.00%)                  | \$0.00 (0.00%)                       |
| 4. <a href="#">es-es</a>  | 126,197 (7.99%)                                 | 23.15%                                | 29,212 (6.04%)                           | 41.48%                                | 11.79                               | 00:12:05                               | 0.00%                               | 0 (0.00%)                  | \$0.00 (0.00%)                       |
| 5. <a href="#">fr</a>     | 80,477 (5.10%)                                  | 27.08%                                | 21,796 (4.51%)                           | 24.84%                                | 13.63                               | 00:16:38                               | 0.00%                               | 0 (0.00%)                  | \$0.00 (0.00%)                       |
| 6. <a href="#">de-de</a>  | 35,556 (2.25%)                                  | 36.79%                                | 13,080 (2.70%)                           | 36.29%                                | 9.78                                | 00:10:00                               | 0.00%                               | 0 (0.00%)                  | \$0.00 (0.00%)                       |
| 7. <a href="#">zh-cn</a>  | 31,605 (2.00%)                                  | 23.02%                                | 7,274 (1.50%)                            | 22.25%                                | 12.53                               | 00:14:32                               | 0.00%                               | 0 (0.00%)                  | \$0.00 (0.00%)                       |
| 8. <a href="#">en-gb</a>  | 30,474 (1.93%)                                  | 32.78%                                | 9,990 (2.07%)                            | 36.93%                                | 10.07                               | 00:10:27                               | 0.00%                               | 0 (0.00%)                  | \$0.00 (0.00%)                       |
| 9. <a href="#">es-419</a> | 26,486 (1.68%)                                  | 27.12%                                | 7,182 (1.49%)                            | 26.92%                                | 15.68                               | 00:14:37                               | 0.00%                               | 0 (0.00%)                  | \$0.00 (0.00%)                       |
| 10. <a href="#">de</a>    | 26,317 (1.67%)                                  | 32.70%                                | 8,606 (1.78%)                            | 36.69%                                | 9.37                                | 00:10:54                               | 0.00%                               | 0 (0.00%)                  | \$0.00 (0.00%)                       |
| 11. <a href="#">es-mx</a> | 16,939 (1.07%)                                  | 27.51%                                | 4,660 (0.96%)                            | 18.10%                                | 17.53                               | 00:17:14                               | 0.00%                               | 0 (0.00%)                  | \$0.00 (0.00%)                       |
| 12. <a href="#">ru</a>    | 15,260 (0.97%)                                  | 27.11%                                | 4,137 (0.86%)                            | 37.68%                                | 8.16                                | 00:11:05                               | 0.00%                               | 0 (0.00%)                  | \$0.00 (0.00%)                       |
| 13. <a href="#">en</a>    | 14,729 (0.93%)                                  | 45.63%                                | 6,721 (1.39%)                            | 56.01%                                | 6.02                                | 00:06:12                               | 0.00%                               | 0 (0.00%)                  | \$0.00 (0.00%)                       |
| 14. <a href="#">zh-tw</a> | 13,107 (0.83%)                                  | 24.01%                                | 3,147 (0.65%)                            | 30.65%                                | 9.46                                | 00:11:55                               | 0.00%                               | 0 (0.00%)                  | \$0.00 (0.00%)                       |
| 15. <a href="#">ko</a>    | 11,369 (0.72%)                                  | 22.16%                                | 2,519 (0.52%)                            | 24.87%                                | 11.19                               | 00:12:37                               | 0.00%                               | 0 (0.00%)                  | \$0.00 (0.00%)                       |
| 16. <a href="#">ja</a>    | 10,871 (0.69%)                                  | 30.47%                                | 3,312 (0.68%)                            | 29.45%                                | 12.85                               | 00:09:40                               | 0.00%                               | 0 (0.00%)                  | \$0.00 (0.00%)                       |
| 17. <a href="#">it</a>    | 10,529 (0.67%)                                  | 38.93%                                | 4,099 (0.85%)                            | 33.93%                                | 8.76                                | 00:09:08                               | 0.00%                               | 0 (0.00%)                  | \$0.00 (0.00%)                       |
| 18. <a href="#">pl</a>    | 10,167 (0.64%)                                  | 29.08%                                | 2,957 (0.61%)                            | 42.18%                                | 10.12                               | 00:09:00                               | 0.00%                               | 0 (0.00%)                  | \$0.00 (0.00%)                       |
| 19. <a href="#">nl</a>    | 9,993 (0.63%)                                   | 37.91%                                | 3,788 (0.78%)                            | 42.72%                                | 6.11                                | 00:07:00                               | 0.00%                               | 0 (0.00%)                  | \$0.00 (0.00%)                       |
| 20. <a href="#">fr-fr</a> | 7,363 (0.47%)                                   | 25.32%                                | 1,864 (0.39%)                            | 54.45%                                | 6.84                                | 00:05:32                               | 0.00%                               | 0 (0.00%)                  | \$0.00 (0.00%)                       |
| 21. <a href="#">cs</a>    | 7,337 (0.46%)                                   | 29.66%                                | 2,176 (0.45%)                            | 40.15%                                | 12.01                               | 00:10:11                               | 0.00%                               | 0 (0.00%)                  | \$0.00 (0.00%)                       |
| 22. <a href="#">es-ar</a> | 7,089 (0.45%)                                   | 30.10%                                | 2,134 (0.44%)                            | 18.18%                                | 15.36                               | 00:16:00                               | 0.00%                               | 0 (0.00%)                  | \$0.00 (0.00%)                       |
| 23. <a href="#">ru-ru</a> | 6,284 (0.40%)                                   | 25.10%                                | 1,577 (0.33%)                            | 40.82%                                | 8.22                                | 00:08:05                               | 0.00%                               | 0 (0.00%)                  | \$0.00 (0.00%)                       |
| 24. <a href="#">it-it</a> | 5,821 (0.37%)                                   | 37.12%                                | 2,161 (0.45%)                            | 43.67%                                | 6.78                                | 00:06:39                               | 0.00%                               | 0 (0.00%)                  | \$0.00 (0.00%)                       |
| 25. <a href="#">pt-pt</a> | 4,255 (0.27%)                                   | 37.44%                                | 1,593 (0.33%)                            | 35.06%                                | 7.29                                | 00:07:34                               | 0.00%                               | 0 (0.00%)                  | \$0.00 (0.00%)                       |
| 26. <a href="#">sv-se</a> | 3,496 (0.22%)                                   | 16.19%                                | 566 (0.12%)                              | 38.84%                                | 7.49                                | 00:08:11                               | 0.00%                               | 0 (0.00%)                  | \$0.00 (0.00%)                       |

|     |                       |                                     |        |                              |        |       |          |       |                          |                               |
|-----|-----------------------|-------------------------------------|--------|------------------------------|--------|-------|----------|-------|--------------------------|-------------------------------|
| 27. | <a href="#">tr</a>    | <b>3,007</b> <small>(0.19%)</small> | 54.14% | 1,628 <small>(0.34%)</small> | 46.69% | 8.70  | 00:05:54 | 0.00% | 0 <small>(0.00%)</small> | \$0.00 <small>(0.00%)</small> |
| 28. | <a href="#">ja-jp</a> | <b>2,262</b> <small>(0.14%)</small> | 27.94% | 632 <small>(0.13%)</small>   | 48.28% | 6.46  | 00:04:42 | 0.00% | 0 <small>(0.00%)</small> | \$0.00 <small>(0.00%)</small> |
| 29. | <a href="#">sv</a>    | <b>1,992</b> <small>(0.13%)</small> | 37.70% | 751 <small>(0.16%)</small>   | 42.62% | 5.86  | 00:06:24 | 0.00% | 0 <small>(0.00%)</small> | \$0.00 <small>(0.00%)</small> |
| 30. | <a href="#">sk</a>    | <b>1,968</b> <small>(0.12%)</small> | 29.07% | 572 <small>(0.12%)</small>   | 44.92% | 6.04  | 00:06:23 | 0.00% | 0 <small>(0.00%)</small> | \$0.00 <small>(0.00%)</small> |
| 31. | <a href="#">th</a>    | <b>1,736</b> <small>(0.11%)</small> | 56.45% | 980 <small>(0.20%)</small>   | 50.17% | 4.56  | 00:04:53 | 0.00% | 0 <small>(0.00%)</small> | \$0.00 <small>(0.00%)</small> |
| 32. | <a href="#">vi</a>    | <b>1,707</b> <small>(0.11%)</small> | 49.68% | 848 <small>(0.18%)</small>   | 39.07% | 7.84  | 00:08:17 | 0.00% | 0 <small>(0.00%)</small> | \$0.00 <small>(0.00%)</small> |
| 33. | <a href="#">pt</a>    | <b>1,625</b> <small>(0.10%)</small> | 42.89% | 697 <small>(0.14%)</small>   | 34.83% | 8.82  | 00:09:01 | 0.00% | 0 <small>(0.00%)</small> | \$0.00 <small>(0.00%)</small> |
| 34. | <a href="#">id</a>    | <b>1,623</b> <small>(0.10%)</small> | 58.72% | 953 <small>(0.20%)</small>   | 52.62% | 6.42  | 00:09:05 | 0.00% | 0 <small>(0.00%)</small> | \$0.00 <small>(0.00%)</small> |
| 35. | <a href="#">ca</a>    | <b>1,601</b> <small>(0.10%)</small> | 51.78% | 829 <small>(0.17%)</small>   | 27.73% | 8.55  | 00:08:51 | 0.00% | 0 <small>(0.00%)</small> | \$0.00 <small>(0.00%)</small> |
| 36. | <a href="#">ko-kr</a> | <b>1,316</b> <small>(0.08%)</small> | 14.06% | 185 <small>(0.04%)</small>   | 24.16% | 9.70  | 00:11:14 | 0.00% | 0 <small>(0.00%)</small> | \$0.00 <small>(0.00%)</small> |
| 37. | <a href="#">da</a>    | <b>1,294</b> <small>(0.08%)</small> | 47.76% | 618 <small>(0.13%)</small>   | 42.58% | 6.66  | 00:05:44 | 0.00% | 0 <small>(0.00%)</small> | \$0.00 <small>(0.00%)</small> |
| 38. | <a href="#">nb-no</a> | <b>1,066</b> <small>(0.07%)</small> | 15.76% | 168 <small>(0.03%)</small>   | 40.62% | 15.29 | 00:10:21 | 0.00% | 0 <small>(0.00%)</small> | \$0.00 <small>(0.00%)</small> |
| 39. | <a href="#">es-cl</a> | <b>1,011</b> <small>(0.06%)</small> | 38.28% | 387 <small>(0.08%)</small>   | 27.70% | 9.23  | 00:10:24 | 0.00% | 0 <small>(0.00%)</small> | \$0.00 <small>(0.00%)</small> |
| 40. | <a href="#">hu</a>    | <b>893</b> <small>(0.06%)</small>   | 68.98% | 616 <small>(0.13%)</small>   | 62.15% | 4.06  | 00:02:36 | 0.00% | 0 <small>(0.00%)</small> | \$0.00 <small>(0.00%)</small> |
| 41. | <a href="#">el</a>    | <b>878</b> <small>(0.06%)</small>   | 63.90% | 561 <small>(0.12%)</small>   | 58.31% | 3.78  | 00:02:25 | 0.00% | 0 <small>(0.00%)</small> | \$0.00 <small>(0.00%)</small> |
| 42. | <a href="#">nl-nl</a> | <b>804</b> <small>(0.05%)</small>   | 61.07% | 491 <small>(0.10%)</small>   | 66.42% | 5.09  | 00:02:06 | 0.00% | 0 <small>(0.00%)</small> | \$0.00 <small>(0.00%)</small> |
| 43. | <a href="#">hu-hu</a> | <b>800</b> <small>(0.05%)</small>   | 64.12% | 513 <small>(0.11%)</small>   | 66.62% | 3.52  | 00:01:58 | 0.00% | 0 <small>(0.00%)</small> | \$0.00 <small>(0.00%)</small> |
| 44. | <a href="#">th-th</a> | <b>786</b> <small>(0.05%)</small>   | 42.11% | 331 <small>(0.07%)</small>   | 41.22% | 6.42  | 00:06:45 | 0.00% | 0 <small>(0.00%)</small> | \$0.00 <small>(0.00%)</small> |
| 45. | <a href="#">es-la</a> | <b>783</b> <small>(0.05%)</small>   | 29.50% | 231 <small>(0.05%)</small>   | 41.51% | 9.17  | 00:09:12 | 0.00% | 0 <small>(0.00%)</small> | \$0.00 <small>(0.00%)</small> |
| 46. | <a href="#">ar</a>    | <b>762</b> <small>(0.05%)</small>   | 51.05% | 389 <small>(0.08%)</small>   | 56.96% | 3.29  | 00:03:04 | 0.00% | 0 <small>(0.00%)</small> | \$0.00 <small>(0.00%)</small> |
| 47. | <a href="#">tr-tr</a> | <b>717</b> <small>(0.05%)</small>   | 36.54% | 262 <small>(0.05%)</small>   | 48.26% | 4.89  | 00:05:30 | 0.00% | 0 <small>(0.00%)</small> | \$0.00 <small>(0.00%)</small> |
| 48. | <a href="#">en-au</a> | <b>634</b> <small>(0.04%)</small>   | 25.08% | 159 <small>(0.03%)</small>   | 26.34% | 8.41  | 00:09:26 | 0.00% | 0 <small>(0.00%)</small> | \$0.00 <small>(0.00%)</small> |
| 49. | <a href="#">fi</a>    | <b>620</b> <small>(0.04%)</small>   | 41.77% | 259 <small>(0.05%)</small>   | 38.06% | 16.66 | 00:09:55 | 0.00% | 0 <small>(0.00%)</small> | \$0.00 <small>(0.00%)</small> |
| 50. | <a href="#">bg</a>    | <b>616</b> <small>(0.04%)</small>   | 62.82% | 387 <small>(0.08%)</small>   | 61.20% | 4.21  | 00:03:49 | 0.00% | 0 <small>(0.00%)</small> | \$0.00 <small>(0.00%)</small> |
| 51. | <a href="#">zh-hk</a> | <b>613</b> <small>(0.04%)</small>   | 32.63% | 200 <small>(0.04%)</small>   | 30.18% | 5.98  | 00:04:49 | 0.00% | 0 <small>(0.00%)</small> | \$0.00 <small>(0.00%)</small> |
| 52. | <a href="#">fi-fi</a> | <b>603</b> <small>(0.04%)</small>   | 38.97% | 235 <small>(0.05%)</small>   | 42.29% | 7.07  | 00:07:41 | 0.00% | 0 <small>(0.00%)</small> | \$0.00 <small>(0.00%)</small> |
| 53. | <a href="#">et</a>    | <b>595</b> <small>(0.04%)</small>   | 42.35% | 252 <small>(0.05%)</small>   | 32.44% | 5.46  | 00:07:02 | 0.00% | 0 <small>(0.00%)</small> | \$0.00 <small>(0.00%)</small> |
| 54. | <a href="#">fil</a>   | <b>543</b> <small>(0.03%)</small>   | 69.43% | 377 <small>(0.08%)</small>   | 70.72% | 2.04  | 00:01:29 | 0.00% | 0 <small>(0.00%)</small> | \$0.00 <small>(0.00%)</small> |
| 55. | <a href="#">el-gr</a> | <b>513</b> <small>(0.03%)</small>   | 68.81% | 353 <small>(0.07%)</small>   | 54.39% | 5.99  | 00:03:45 | 0.00% | 0 <small>(0.00%)</small> | \$0.00 <small>(0.00%)</small> |
| 56. | <a href="#">vi-vn</a> | <b>504</b> <small>(0.03%)</small>   | 49.01% | 247 <small>(0.05%)</small>   | 43.85% | 5.70  | 00:06:18 | 0.00% | 0 <small>(0.00%)</small> | \$0.00 <small>(0.00%)</small> |
| 57. | <a href="#">lt</a>    | <b>480</b> <small>(0.03%)</small>   | 45.62% | 219 <small>(0.05%)</small>   | 45.00% | 10.29 | 00:08:54 | 0.00% | 0 <small>(0.00%)</small> | \$0.00 <small>(0.00%)</small> |
| 58. | <a href="#">he</a>    | <b>449</b> <small>(0.03%)</small>   | 66.37% | 298 <small>(0.06%)</small>   | 59.24% | 4.42  | 00:02:59 | 0.00% | 0 <small>(0.00%)</small> | \$0.00 <small>(0.00%)</small> |
| 59. | <a href="#">es-us</a> | <b>434</b> <small>(0.03%)</small>   | 44.70% | 194 <small>(0.04%)</small>   | 45.39% | 6.68  | 00:08:54 | 0.00% | 0 <small>(0.00%)</small> | \$0.00 <small>(0.00%)</small> |
| 60. | <a href="#">ro</a>    | <b>397</b> <small>(0.03%)</small>   | 60.96% | 242 <small>(0.05%)</small>   | 55.92% | 5.70  | 00:04:27 | 0.00% | 0 <small>(0.00%)</small> | \$0.00 <small>(0.00%)</small> |
| 61. | <a href="#">sl</a>    | <b>365</b> <small>(0.02%)</small>   | 43.84% | 160 <small>(0.03%)</small>   | 45.75% | 4.36  | 00:03:41 | 0.00% | 0 <small>(0.00%)</small> | \$0.00 <small>(0.00%)</small> |
| 62. | <a href="#">no</a>    | <b>351</b> <small>(0.02%)</small>   | 45.58% | 160 <small>(0.03%)</small>   | 41.03% | 7.67  | 00:05:19 | 0.00% | 0 <small>(0.00%)</small> | \$0.00 <small>(0.00%)</small> |
| 63. | <a href="#">es-xl</a> | <b>297</b> <small>(0.02%)</small>   | 13.80% | 41 <small>(0.01%)</small>    | 34.01% | 16.78 | 00:10:30 | 0.00% | 0 <small>(0.00%)</small> | \$0.00 <small>(0.00%)</small> |
| 64. | <a href="#">lv</a>    | <b>279</b> <small>(0.02%)</small>   | 35.13% | 98 <small>(0.02%)</small>    | 36.92% | 6.94  | 00:06:19 | 0.00% | 0 <small>(0.00%)</small> | \$0.00 <small>(0.00%)</small> |
| 65. | <a href="#">hr-hr</a> | <b>270</b> <small>(0.02%)</small>   | 81.85% | 221 <small>(0.05%)</small>   | 41.85% | 4.40  | 00:02:30 | 0.00% | 0 <small>(0.00%)</small> | \$0.00 <small>(0.00%)</small> |
| 66. | <a href="#">de-at</a> | <b>251</b> <small>(0.02%)</small>   | 35.46% | 89 <small>(0.02%)</small>    | 23.51% | 9.35  | 00:11:08 | 0.00% | 0 <small>(0.00%)</small> | \$0.00 <small>(0.00%)</small> |

|      |                           |                                   |        |                            |        |       |          |       |                          |                               |
|------|---------------------------|-----------------------------------|--------|----------------------------|--------|-------|----------|-------|--------------------------|-------------------------------|
| 67.  | <a href="#">hr</a>        | <b>233</b> <small>(0.01%)</small> | 68.24% | 159 <small>(0.03%)</small> | 62.23% | 2.88  | 00:01:38 | 0.00% | 0 <small>(0.00%)</small> | \$0.00 <small>(0.00%)</small> |
| 68.  | <a href="#">da-dk</a>     | <b>232</b> <small>(0.01%)</small> | 48.71% | 113 <small>(0.02%)</small> | 68.10% | 2.91  | 00:02:19 | 0.00% | 0 <small>(0.00%)</small> | \$0.00 <small>(0.00%)</small> |
| 69.  | <a href="#">es-pe</a>     | <b>215</b> <small>(0.01%)</small> | 11.16% | 24 <small>(0.00%)</small>  | 8.37%  | 18.13 | 00:20:19 | 0.00% | 0 <small>(0.00%)</small> | \$0.00 <small>(0.00%)</small> |
| 70.  | <a href="#">ro-ro</a>     | <b>215</b> <small>(0.01%)</small> | 49.30% | 106 <small>(0.02%)</small> | 45.12% | 9.48  | 00:09:43 | 0.00% | 0 <small>(0.00%)</small> | \$0.00 <small>(0.00%)</small> |
| 71.  | <a href="#">uk</a>        | <b>209</b> <small>(0.01%)</small> | 68.90% | 144 <small>(0.03%)</small> | 59.33% | 4.10  | 00:02:51 | 0.00% | 0 <small>(0.00%)</small> | \$0.00 <small>(0.00%)</small> |
| 72.  | <a href="#">(not set)</a> | <b>197</b> <small>(0.01%)</small> | 73.60% | 145 <small>(0.03%)</small> | 38.58% | 3.98  | 00:03:28 | 0.00% | 0 <small>(0.00%)</small> | \$0.00 <small>(0.00%)</small> |
| 73.  | <a href="#">cs-cz</a>     | <b>194</b> <small>(0.01%)</small> | 65.46% | 127 <small>(0.03%)</small> | 66.49% | 2.96  | 00:02:29 | 0.00% | 0 <small>(0.00%)</small> | \$0.00 <small>(0.00%)</small> |
| 74.  | <a href="#">sr</a>        | <b>174</b> <small>(0.01%)</small> | 80.46% | 140 <small>(0.03%)</small> | 65.52% | 3.45  | 00:02:19 | 0.00% | 0 <small>(0.00%)</small> | \$0.00 <small>(0.00%)</small> |
| 75.  | <a href="#">es-pa</a>     | <b>171</b> <small>(0.01%)</small> | 22.22% | 38 <small>(0.01%)</small>  | 19.88% | 11.39 | 00:09:53 | 0.00% | 0 <small>(0.00%)</small> | \$0.00 <small>(0.00%)</small> |
| 76.  | <a href="#">ja-jp-mac</a> | <b>167</b> <small>(0.01%)</small> | 26.35% | 44 <small>(0.01%)</small>  | 16.77% | 5.62  | 00:06:47 | 0.00% | 0 <small>(0.00%)</small> | \$0.00 <small>(0.00%)</small> |
| 77.  | <a href="#">pl-pl</a>     | <b>160</b> <small>(0.01%)</small> | 56.25% | 90 <small>(0.02%)</small>  | 72.50% | 3.49  | 00:02:20 | 0.00% | 0 <small>(0.00%)</small> | \$0.00 <small>(0.00%)</small> |
| 78.  | <a href="#">es-co</a>     | <b>153</b> <small>(0.01%)</small> | 29.41% | 45 <small>(0.01%)</small>  | 69.93% | 2.94  | 00:02:14 | 0.00% | 0 <small>(0.00%)</small> | \$0.00 <small>(0.00%)</small> |
| 79.  | <a href="#">en-za</a>     | <b>140</b> <small>(0.01%)</small> | 71.43% | 100 <small>(0.02%)</small> | 67.14% | 3.62  | 00:02:55 | 0.00% | 0 <small>(0.00%)</small> | \$0.00 <small>(0.00%)</small> |
| 80.  | <a href="#">en_gb</a>     | <b>130</b> <small>(0.01%)</small> | 83.08% | 108 <small>(0.02%)</small> | 74.62% | 1.92  | 00:01:05 | 0.00% | 0 <small>(0.00%)</small> | \$0.00 <small>(0.00%)</small> |
| 81.  | <a href="#">ar-sa</a>     | <b>117</b> <small>(0.01%)</small> | 73.50% | 86 <small>(0.02%)</small>  | 65.81% | 2.10  | 00:01:10 | 0.00% | 0 <small>(0.00%)</small> | \$0.00 <small>(0.00%)</small> |
| 82.  | <a href="#">nb</a>        | <b>111</b> <small>(0.01%)</small> | 72.97% | 81 <small>(0.02%)</small>  | 69.37% | 2.40  | 00:00:58 | 0.00% | 0 <small>(0.00%)</small> | \$0.00 <small>(0.00%)</small> |
| 83.  | <a href="#">en_us</a>     | <b>99</b> <small>(0.01%)</small>  | 87.88% | 87 <small>(0.02%)</small>  | 68.69% | 1.94  | 00:01:04 | 0.00% | 0 <small>(0.00%)</small> | \$0.00 <small>(0.00%)</small> |
| 84.  | <a href="#">en-ca</a>     | <b>94</b> <small>(0.01%)</small>  | 79.79% | 75 <small>(0.02%)</small>  | 50.00% | 4.10  | 00:03:21 | 0.00% | 0 <small>(0.00%)</small> | \$0.00 <small>(0.00%)</small> |
| 85.  | <a href="#">c</a>         | <b>91</b> <small>(0.01%)</small>  | 98.90% | 90 <small>(0.02%)</small>  | 95.60% | 1.22  | 00:00:13 | 0.00% | 0 <small>(0.00%)</small> | \$0.00 <small>(0.00%)</small> |
| 86.  | <a href="#">es-uy</a>     | <b>85</b> <small>(0.01%)</small>  | 62.35% | 53 <small>(0.01%)</small>  | 11.76% | 16.92 | 00:09:45 | 0.00% | 0 <small>(0.00%)</small> | \$0.00 <small>(0.00%)</small> |
| 87.  | <a href="#">ca-es</a>     | <b>77</b> <small>(0.00%)</small>  | 79.22% | 61 <small>(0.01%)</small>  | 58.44% | 3.34  | 00:02:37 | 0.00% | 0 <small>(0.00%)</small> | \$0.00 <small>(0.00%)</small> |
| 88.  | <a href="#">en-in</a>     | <b>69</b> <small>(0.00%)</small>  | 92.75% | 64 <small>(0.01%)</small>  | 75.36% | 1.65  | 00:00:42 | 0.00% | 0 <small>(0.00%)</small> | \$0.00 <small>(0.00%)</small> |
| 89.  | <a href="#">es-ve</a>     | <b>59</b> <small>(0.00%)</small>  | 40.68% | 24 <small>(0.00%)</small>  | 28.81% | 17.68 | 00:21:41 | 0.00% | 0 <small>(0.00%)</small> | \$0.00 <small>(0.00%)</small> |
| 90.  | <a href="#">es-bo</a>     | <b>52</b> <small>(0.00%)</small>  | 19.23% | 10 <small>(0.00%)</small>  | 3.85%  | 78.08 | 00:34:39 | 0.00% | 0 <small>(0.00%)</small> | \$0.00 <small>(0.00%)</small> |
| 91.  | <a href="#">es-cr</a>     | <b>52</b> <small>(0.00%)</small>  | 32.69% | 17 <small>(0.00%)</small>  | 19.23% | 10.00 | 00:12:46 | 0.00% | 0 <small>(0.00%)</small> | \$0.00 <small>(0.00%)</small> |
| 92.  | <a href="#">fa-ir</a>     | <b>51</b> <small>(0.00%)</small>  | 50.98% | 26 <small>(0.01%)</small>  | 56.86% | 3.80  | 00:03:54 | 0.00% | 0 <small>(0.00%)</small> | \$0.00 <small>(0.00%)</small> |
| 93.  | <a href="#">fr-ch</a>     | <b>50</b> <small>(0.00%)</small>  | 50.00% | 25 <small>(0.01%)</small>  | 34.00% | 7.28  | 00:04:20 | 0.00% | 0 <small>(0.00%)</small> | \$0.00 <small>(0.00%)</small> |
| 94.  | <a href="#">es-ec</a>     | <b>48</b> <small>(0.00%)</small>  | 75.00% | 36 <small>(0.01%)</small>  | 37.50% | 17.21 | 00:14:37 | 0.00% | 0 <small>(0.00%)</small> | \$0.00 <small>(0.00%)</small> |
| 95.  | <a href="#">he-il</a>     | <b>47</b> <small>(0.00%)</small>  | 51.06% | 24 <small>(0.00%)</small>  | 68.09% | 1.96  | 00:01:07 | 0.00% | 0 <small>(0.00%)</small> | \$0.00 <small>(0.00%)</small> |
| 96.  | <a href="#">es-ni</a>     | <b>43</b> <small>(0.00%)</small>  | 18.60% | 8 <small>(0.00%)</small>   | 30.23% | 22.00 | 00:11:58 | 0.00% | 0 <small>(0.00%)</small> | \$0.00 <small>(0.00%)</small> |
| 97.  | <a href="#">fr-ca</a>     | <b>41</b> <small>(0.00%)</small>  | 63.41% | 26 <small>(0.01%)</small>  | 36.59% | 46.32 | 00:10:40 | 0.00% | 0 <small>(0.00%)</small> | \$0.00 <small>(0.00%)</small> |
| 98.  | <a href="#">de-ch</a>     | <b>40</b> <small>(0.00%)</small>  | 70.00% | 28 <small>(0.01%)</small>  | 57.50% | 2.52  | 00:01:07 | 0.00% | 0 <small>(0.00%)</small> | \$0.00 <small>(0.00%)</small> |
| 99.  | <a href="#">en-nz</a>     | <b>36</b> <small>(0.00%)</small>  | 75.00% | 27 <small>(0.01%)</small>  | 72.22% | 3.00  | 00:01:19 | 0.00% | 0 <small>(0.00%)</small> | \$0.00 <small>(0.00%)</small> |
| 100. | <a href="#">kau</a>       | <b>33</b> <small>(0.00%)</small>  | 93.94% | 31 <small>(0.01%)</small>  | 72.73% | 1.48  | 00:00:42 | 0.00% | 0 <small>(0.00%)</small> | \$0.00 <small>(0.00%)</small> |
