# Supplementary material for: Trends in access of plant biodiversity data revealed by Google Analytics
Source: Biodivers Data J. 2014 Nov 11;(2):e1558. doi: 10.3897/BDJ.2.e1558 (PMC4238075; doi:10.3897/BDJ.2.e1558)
Supplement: Supplementary material 21 — Percent returning sessions [file biodiversity_data_journal-2-e1558-s021.xlsx]

## Sheet: Sheet1
Project	2007	2008	2009	2010	2011	2012	2013
CCH	74.82	72.9	76.15	76.67	78.68	80.13	82.67
CNABH						40.63	47.72
CNALH						58.05	42.54
CoTRAM						31.32	25.85
eFlora			32.04	36.77	43.06	44.63	44.87
FloraBase					58.29	57.45	57.94
GBIF							26.5
HVAA					27.29	27.86	25.5
Jepson					73.08	72.01	69.3
LSU Keys		38.54	44.49	50.16	56.09	57.66	47.6
ON					21.26	17.38	15.77
Orowiki					38.12	39.66	36.83
PNW						60.23	63.39
SEINet				34.82	40.23	43.74	45.41
Tropicos		72.41	72.51	77.03	72.57	69.53	67
